# Supplementary material for: A glycerol mediated domino reaction: an efficient, green synthesis of polyheterocycles incorporating a new thiochromeno[2,3-b]quinoline unit
Source: Royal Society of Chemistry journal article supplement (doi:10.1039/c3ra43205j), 2013-01-01

## Supporting Information

### A glycerol mediated domino reaction: an efficient, green synthesis of polyheterocycles incorporating a new thiochromeno[2,3-*b*]quinoline unit

Narsidas J. Parmar<sup>\*a</sup>, Hitesh A. Barad<sup>a</sup>, Balvantsingh L. Labana<sup>a</sup>, Rajnikant<sup>b</sup>, Vivek K. Gupta<sup>b</sup>

<sup>a</sup>Department of Chemistry, Sardar Patel University, Vallabh Vidyanagar-388120. Dist. Anand, Gujarat, India

<sup>b</sup>Post graduate Department of Physics, University of Jammu, Jammu Tawi-180006, India

| Sr. No. | Description                                                                                                                                      | Page No. |
|---------|--------------------------------------------------------------------------------------------------------------------------------------------------|----------|
| 1.1     | General methods                                                                                                                                  | 1-2      |
| 1.2     | General procedure for synthesis of 2-mercaptoquinoline-3-carbaldehyde ( <b>1a-c</b> )                                                            | 2        |
| 1.3     | General experimental procedure and analytical data for synthesis of thiopyrano[2,3- <i>b</i> ]quinoline-3-carbaldehyde ( <b>3a-c</b> )           | 3        |
| 1.4     | General experimental procedure for synthesis of pyrazolo[4'',3''':5',6']pyrano[4',3':5,6] thiochromeno[2,3- <i>b</i> ]quinolines ( <b>5a-r</b> ) | 4        |
| 1.5     | Analytical data for compounds                                                                                                                    | 4-7      |
| 1.6     | Single crystal X-Ray data of <b>5a</b>                                                                                                           | 8-9      |
| 1.7     | 2D NMR experiments: NOE and Cosy for <b>5a</b>                                                                                                   | 10-11    |
| 1.8     | <sup>1</sup> H NMR, <sup>13</sup> C NMR and Mass Spectral Data                                                                                   | 12-32    |

#### 1.1 General methods

All solvents and reagents were used as supplied from commercial sources. The recorded melting points are uncorrected. IR spectra were recorded in KBr on Shimadzu FT-IR 8401 spectrometer and are reported in wave numbers (cm<sup>-1</sup>). A single crystal-X-ray diffraction data were collected on *X'calibur* CCD area-detector diffractometer equipped with graphite monochromated MoK $\alpha$  radiation ( $\lambda=0.71073$  Å). <sup>1</sup>H NMR and <sup>13</sup>C NMR spectra were recorded on a Bruker Avance 400 spectrometer operating at 400 MHz for <sup>1</sup>H NMR and 100 MHz for <sup>13</sup>C NMR as solutions in CDCl<sub>3</sub>, unless otherwise indicated. Chemical shifts are reported as parts per million (ppm,  $\delta$ ) and referenced to the residual protic solvent. Coupling

constants are reported in Hertz (Hz). Splitting patterns are designated as s, singlet; d, doublet; t, triplet; q, quartet; br, broad; m, multiplet; comp, complex multiplet. The degree of substitution (C, CH, CH<sub>2</sub>, and CH<sub>3</sub>) was determined by the APT method. The ESI mass spectra were measured on Shimadzu LCMS-2010 spectrometer. TLC was performed on Merck 60 F254 pre-coated silica plates, spots were detected either by UV (254 nm, 366 nm) or dipping into a permanganate [KMnO<sub>4</sub> (3 g), K<sub>2</sub>CO<sub>3</sub> (20 g), NaOH (5 mL, 5% in H<sub>2</sub>O), H<sub>2</sub>O (300 mL)] or an anisaldehyde solution [3% p- methoxybenzaldehyde and 1% H<sub>2</sub>SO<sub>4</sub> in MeOH] or 2,4 Dinitro phenyl hydrazine solution [2,4-DNP (12 g), Conc. H<sub>2</sub>SO<sub>4</sub> (6 mL), Water (8 mL), EtOH (20 mL)] followed by heating.

## 1.2 General Procedure for Synthesis of 2-mercaptoquinoline-3-carbaldehydes (1a-c)

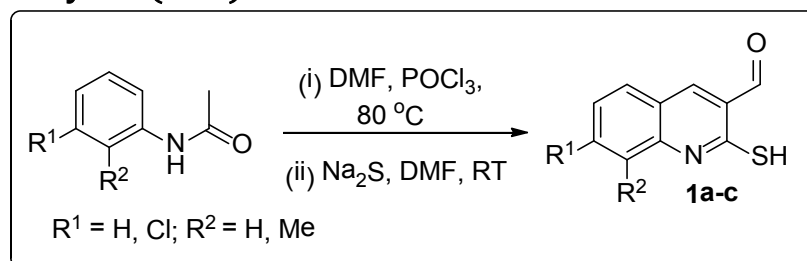

Synthesis of 2-mercaptoquinoline-3-carbaldehyde

### 1.2.1 2-chloroquinoline-3-carbaldehyde:

POCl<sub>3</sub> (98.28 mmol) was added drop wise to DMF (34.65 mmol) while maintaining the temperature at 0–5 °C. The mixture was allowed to stir for about 5 min. Acetanilide (10.37 mmol) was then added and the resulting solution heated for 8 h at 75–80 °C. The reaction mixture was cooled to room temperature and then poured into crushed ice with stirring. A pale yellow precipitate appeared immediately and was filtered and washed with water and then dried. The crude compound was recrystallized from ethyl acetate.

### 1.2.2 2-mercaptoquinoline-3-carbaldehyde 1a-c :

To a solution of 2-chloroquinoline-3-carbaldehyde (1 mmole) in dry DMF (5 mL), powder sodium sulphide (1.5 mmole) was added and stirred for 1-2 h at room temperature. On completion of the reaction, the reaction mixture was poured into ice-water and made acidic with acetic acid. The product was filtered off, washed well with water, dried and was pure enough for further use.

### 1.3 General Experimental Procedure and analytical data for Synthesis of thiopyrano[2,3-*b*]quinoline-3-carbaldehydes (**3a-c**)

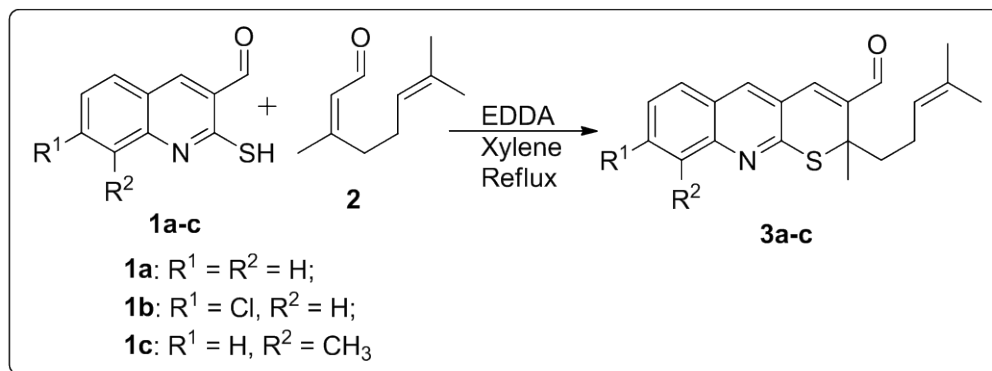

Synthesis of thiopyrano[2,3-*b*]quinoline-3-carbaldehydes **3a-c**

2-mercaptoquinoline-3-carbaldehyde (**1a-c**) (2.0 mmol) and citral (**2**) (2.4 mmol) were dissolved in xylene (20 mL), and ethylenediamine diacetate (0.4 mmol) was added at room temperature. The mixture was refluxed for 3-3.5 h and then cooled to room temperature. Removal of solvent at reduced pressure left an oily residue, which was then purified by column chromatography on silica gel using a mixture of hexane/ethyl acetate (10 : 1) as an eluent to give product **3a-c** as a yellow solid.

#### 2-methyl-2-(4-methylpent-3-en-1-yl)-2H-thiopyrano[2,3-*b*]quinoline-3-carbaldehyde (**3a**):

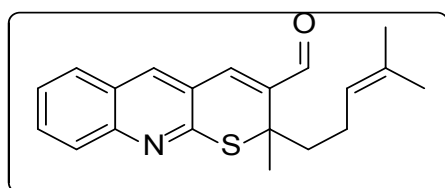

Isolated Yield (0.46 g, 72 %) as yellow crystals, mp 70-72 °C;  $\nu_{\text{max}}/\text{cm}^{-1}$  = 3054.20, 2973.43, 2900.84, 2852.91, 1683.90, 1608.90, 1553.70, 1374.75, 1177.35, 1094.67, 920.27, 741.27;  $\delta_{\text{H}}$  (400 MHz, CDCl<sub>3</sub>) 1.53 (s, 3H, CH<sub>3</sub>), 1.63 (s, 3H, CH<sub>3</sub>), 1.69-1.79 (m, 2H, CH<sub>2</sub>), 1.83 (s, 3H, C(2)CH<sub>3</sub>), 1.96-2.28 (m, 2H, CH<sub>2</sub>), 2.35 (s, 1H, C(4)H), 5.04 (t, 1H, *J* = 6.8 Hz, CH), 7.45-7.95 (m, 5H, Ar-H), 9.63 (s, 1H, CHO) ppm;  $\delta_{\text{C}}$  (100 MHz; CDCl<sub>3</sub>) 24.46, 25.55, 29.19, 41.86, 51.33, 123.18, 123.73, 126.26, 128.05, 128.55, 131.56, 136.82, 137.01, 141.33, 145.46, 145.76, 149.28, 158.74, 191.33 ppm; *m/z* (ESI) 323.9 [M + H<sup>+</sup>].

## 1.4 General experimental procedure for synthesis of pyrazolo[4'',3''':5',6']pyrano[4',3':5,6]thiochromeno[2,3-*b*]quinolines (5a-r)

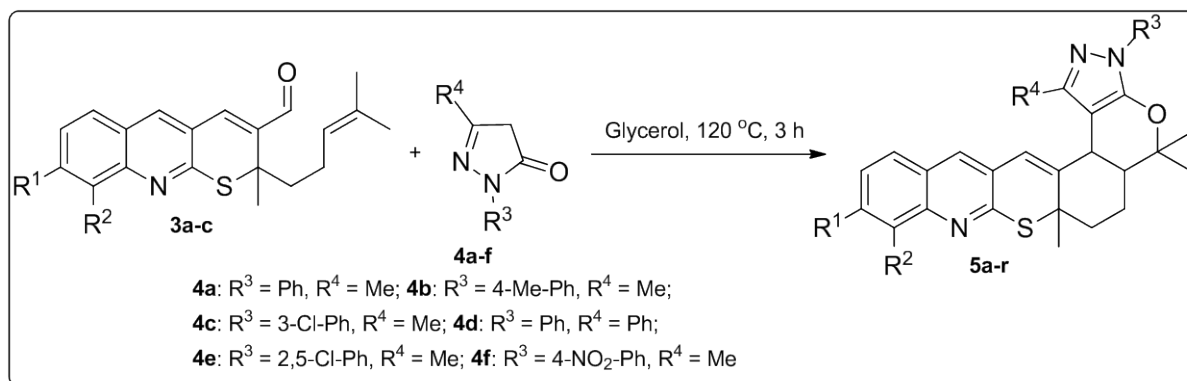

Some 3 mL glycerol were added to an equimolar (3 mmol of each) mixture containing thiopyrano[2,3-*b*]quinoline-3-carbaldehyde (**3a-c**) and 5-pyrazolone (**4a-f**) taken in a 50 mL round-bottomed flask connected to a reflux condenser. The mixture was then stirred at 120 °C. The progress of reaction was monitored by TLC using EtOAc-*n*-hexane (1:4) as an eluent. After completion of the reaction, 5 mL warm water was added to flask. Insoluble crude products thus precipitated were isolated simply by filtration. The filtrate upon water evaporation under reduced pressure at 100 °C left glycerol. The recovered glycerol was reused for the preparation of next product. All the compounds **5a-r** were received quantitatively with an excellent purity.

## 1.5 Analytical data for compounds

### (5aR,15bS)1,5,5,7a-tetramethyl-3-phenyl-5,5a,6,7,7a,15b-hexahydro-3*H*-pyrazolo[4'',3''':5',6']pyrano[4',3':5,6]thiochromeno[2,3-*b*]quinoline (5a)

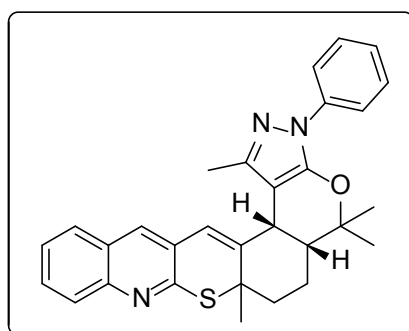

Isolated Yield (1.30 g, 91 %) as yellow crystals, mp 260-262 °C;  $\nu_{\text{max}}/\text{cm}^{-1}$  = 3059.33, 2979.50, 2946.72, 2917.59, 1648.57, 1598.74, 1510.21, 1390.82, 1119.83, 749.23, 689.78;  $\delta_{\text{H}}$  (400 MHz, CDCl<sub>3</sub>) 1.28 (s, 3H, C(5)CH<sub>3</sub>), 1.50 (s, 3H, C(5)CH<sub>3</sub>), 1.64 (s, 3H, C(7a)H), 1.99-2.10 (m, 4H, C(6)&C(7)CH<sub>2</sub>), 2.30 (s, 4H, C(1)CH<sub>3</sub>), 2.40-2.47 (m, 1H, C(5a)H), 3.70 (d, 1H, *J* = 8.4 Hz, C(15b)H), 6.40 (s, 1H, C(15)H), 7.22-7.97 (m, 10H, Ar-H) ppm;  $\delta_{\text{C}}$  (100 MHz; CDCl<sub>3</sub>) 13.28, 21.07, 22.08, 28.13, 30.25, 30.86, 31.91, 33.49, 41.02, 48.01, 84.58, 93.99,

120.10, 122.17, 125.33, 125.83, 126.43, 126.76, 127.63, 127.77, 128.85, 129.59, 132.61, 138.92, 143.27, 147.19, 147.34, 150.46, 158.08 ppm;  $m/z$  (ESI) 479.7  $[M + H^+]$ .

**(5a*R*,15b*S*)1,5,5,7a-tetramethyl-3-(*p*-tolyl)-5,5a,6,7,7a,15b-hexahydro-3*H*-pyrazolo[4'',3'':5',6']pyrano[4',3':5,6]thiochromeno[2,3-*b*]quinoline (5b):**

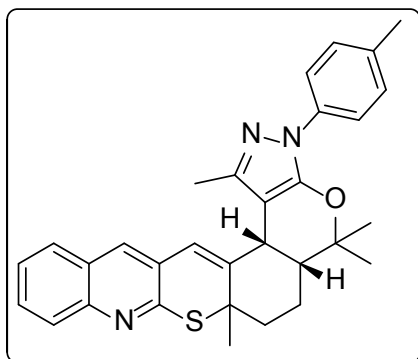

Isolated Yield (1.4 g, 90 %) as yellow crystals, mp 228-230 °C;  $\nu_{\max}/\text{cm}^{-1}$  = 3034.40, 2921.48, 1605.22, 1581.97, 1517.87, 1391.67, 1100.35, 818.66, 749.54;  $\delta_{\text{H}}$  (400 MHz,  $\text{CDCl}_3$ ) 1.27 (s, 3H, C(5)CH<sub>3</sub>), 1.48 (s, 3H, C(5)CH<sub>3</sub>), 1.64 (s, 3H, C(7a)H), 1.82-2.07 (m, 4H, C(6) & C(7)CH<sub>2</sub>), 2.29 (s, 3H, C(1)CH<sub>3</sub>), 2.39 (s, 3H, *p*-CH<sub>3</sub>), 2.41-2.44 (m, 1H, C(5a)H), 3.70 (d, 1H,  $J$  = 8.4 Hz, C(15b)H), 6.40 (s, 1H, C(15)H), 7.23-7.96 (m,

9H, C(Ar)H) ppm;  $\delta_{\text{C}}$  (100 MHz;  $\text{CDCl}_3$ ) 13.35, 20.71, 20.94, 22.13, 28.31, 30.29, 31.96, 33.57, 41.13, 41.35, 47.99, 69.80, 84.26, 120.28, 122.17, 125.87, 126.45, 126.80, 127.57, 129.50, 132.21, 132.49, 135.05, 136.47, 143.25, 143.97, 147.02 ppm;  $m/z$  (ESI) 493.9  $[M + H^+]$ .

**(5a*R*,15b*S*)5,5,7a-trimethyl-1,3-diphenyl-5,5a,6,7,7a,15b-hexahydro-3*H*-pyrazolo[4'',3'':5',6']pyrano[4',3':5,6]thiochromeno[2,3-*b*]quinoline (5d)**

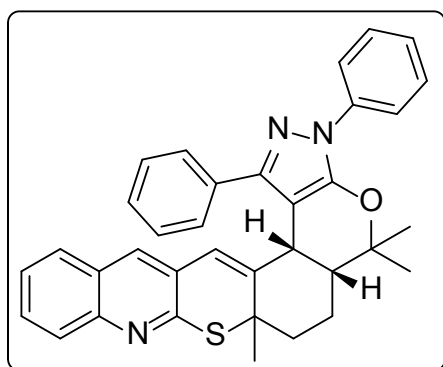

Isolated Yield (1.5 g, 91 %) as yellow crystals, mp 234-236 °C;  $\nu_{\max}/\text{cm}^{-1}$  = 3052.94, 2931.77, 3856.28, 1596.64, 1509.94, 1484.66, 1386.03, 1136.04, 1070.22, 752.18, 691.55;  $\delta_{\text{H}}$  (400 MHz,  $\text{CDCl}_3$ ) 1.32 (s, 3H, C(5)CH<sub>3</sub>), 1.53 (s, 3H, C(5)CH<sub>3</sub>), 1.68 (s, 3H, C(7a)H), 1.88-2.17 (m, 4H, C(6) & C(7)CH<sub>2</sub>), 2.52-2.59 (m, 1H, C(5a)H), 4.09 (d, 1H,  $J$  = 8.4 Hz, C(15b)H), 6.30 (s, 1H, C(15)H),

7.31-7.99 (m, 15H, Ar-H) ppm;  $\delta_{\text{C}}$  (100 MHz;  $\text{CDCl}_3$ ) 13.33, 20.76, 22.06, 28.31, 30.32, 31.88, 33.49, 41.05, 48.07, 84.98, 117.71, 119.99, 121.98, 125.12, 125.19, 126.49, 126.87, 127.02, 128.70, 129.96, 132.10, 134.71, 135.37, 143.49, 147.54, 147.89, 159.48 ppm.

**(5a*R*,15b*S*) 11-chloro-3-(3-chlorophenyl)-1,5,5,7a-tetramethyl-5,5a,6,7,7a,15b-hexahydro-3*H*-pyrazolo[4'',3'':5',6']pyrano[4',3':5,6]thiochromeno[2,3-*b*]quinoline (5i)**

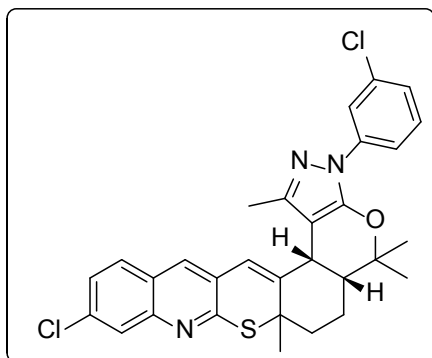

Isolated Yield (1.4 g, 90 %) as yellow crystals, mp 170-172 °C;  $\nu_{\max}/\text{cm}^{-1}$  = 3071.39, 2929.44, 2856.39, 1607.66, 1593.91, 1505.63, 1478.33, 1387.09, 1119.11, 1078.51, 927.51, 881.80, 774.60, 751.77;  $\delta_{\text{H}}$  (400 MHz,  $\text{CDCl}_3$ ) 1.27 (s, 3H, C(5)CH<sub>3</sub>), 1.51 (s, 3H, C(5)CH<sub>3</sub>), 1.63 (s, 3H, C(7a)H), 1.81-2.11 (m, 4H, C(6) & C(7)CH<sub>2</sub>), 2.28 (s, 3H, C(1) CH<sub>3</sub>), 2.40-2.47 (m, 1H, C(5a)H), 3.69

(d, 1H,  $J$  = 6.8 Hz, C(15b)H), 6.35 (s, 1H, C(15)H), 7.19-7.94 (m, 8H, Ar-H) ppm;  $\delta_{\text{C}}$  (100 MHz;  $\text{CDCl}_3$ ) 13.33, 20.76, 22.06, 28.31, 30.32, 31.88, 33.49, 41.05, 48.07, 84.98, 117.71, 119.99, 121.98, 125.12, 125.19, 126.49, 126.87, 127.02, 128.70, 129.96, 132.10, 134.71, 135.37, 143.49, 147.54, 147.89, 159.48 ppm;  $m/z$  (ESI) 547.9 [M + H<sup>+</sup>].

**(5a*R*,15b*S*) 11-chloro-3-(2,5-dichlorophenyl)-1,5,5,7a-tetramethyl-5,5a,6,7,7a,15b-hexahydro-3*H*-pyrazolo[4'',3'':5',6']pyrano[4',3':5,6]thiochromeno[2,3-*b*]quinoline (5k):**

Isolated Yield (1.5 g, 90 %) as yellow crystals, mp 138-140 °C;  $\nu_{\max}/\text{cm}^{-1}$  = 3070.95,

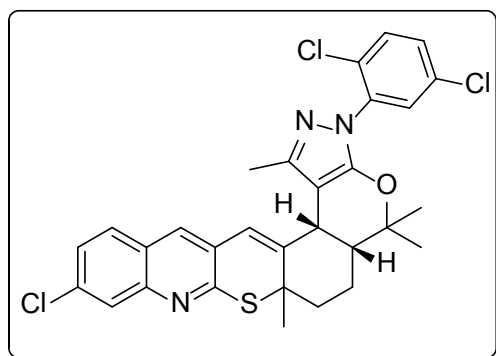

2923.80, 2858.22, 1605.67, 1512.87, 1476.11, 1138.50, 1092.57, 927.73, 870.76, 806.87, 771.99, 656.08, 581.54;  $\delta_{\text{H}}$  (400 MHz,  $\text{CDCl}_3$ ) 1.26 (s, 3H, C(5)CH<sub>3</sub>), 1.38 (s, 3H, C(5)CH<sub>3</sub>), 1.63 (s, 3H, C(7a)H), 1.81-2.11 (m, 4H, C(6) & C(7) CH<sub>2</sub>), 2.28 (s, 3H, C(1)CH<sub>3</sub>), 2.38-2.43 (m, 1H, C(5a)H), 3.70 (d, 1H,  $J$  = 8.4 Hz, C(15b)H), 6.38

(s, 1H, C(15)H), 7.33-7.95 (m, 7H, Ar-H) ppm;  $\delta_{\text{C}}$  (100 MHz;  $\text{CDCl}_3$ ) 13.44, 20.27, 22.10, 28.33, 30.55, 31.90, 33.57, 40.95, 48.12, 85.02, 117.88, 120.09, 122.08, 125.27, 125.37, 126.65, 126.98, 127.92, 128.70, 130.12, 132.08, 135.55, 143.65, 147.78, 147.98, 160.04 ppm.

**(5a*R*,15b*S*) 1,5,5,7a,10-pentamethyl-3-(*p*-tolyl)-5,5a,6,7,7a,15b-hexahydro-3*H*-pyrazolo[4'',3''':5',6']pyrano[4',3':5,6]thiochromeno[2,3-*b*]quinoline (5n):**

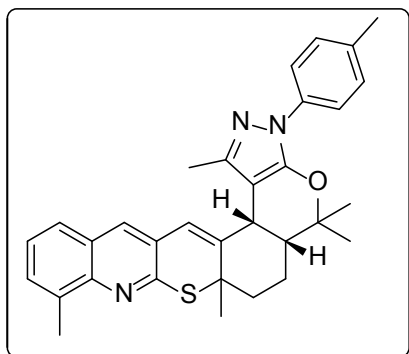

Isolated Yield (1.3 g, 89 %) as yellow crystals, mp 236-238 °C;  $\nu_{\max}/\text{cm}^{-1}$  = 3033.95, 2950.81, 2920.92, 1608.16, 1515.93, 1390.42, 1327.19, 1105.03, 817.96, 756.88;  $\delta_{\text{H}}$  (400 MHz,  $\text{CDCl}_3$ ) 1.26 (s, 3H, C(5)CH<sub>3</sub>), 1.48 (s, 3H, C(5)CH<sub>3</sub>), 1.64 (s, 3H, C(7a)H), 1.98-2.03 (m, 4H, C(6) & C(7)CH<sub>2</sub>), 2.29 (s, 3H, C(1)CH<sub>3</sub>), 2.33 (s, 3H, C(4<sup>1</sup>)CH<sub>3</sub>), 2.40 (m, 1H, C(5a)H), 2.77 (s, 3H, C(10)CH<sub>3</sub>), 3.70 (d, 1H,  $J$  = 8.4 Hz, C(15b)H), 6.39 (s, 1H, C(15)H), 7.25-7.79 (m, 8H, C(Ar)H)ppm;  $\delta_{\text{C}}$  (100 MHz;  $\text{CDCl}_3$ ) 12.88, 13.31, 17.89, 20.68, 20.95, 21.05, 22.09, 28.29, 30.24, 31.85, 33.58, 41.13, 47.87, 84.43, 93.82, 120.31, 121.10, 122.23, 125.58, 126.11, 126.72, 129.43, 129.46, 129.72, 132.88, 135.08, 135.86, 138.17, 142.76, 146.54, 147.09, 156.76 ppm.

**(5a*R*,15b*S*) 1,5,5,7a,10-pentamethyl-3-(4-nitrophenyl)-5,5a,6,7,7a,15b-hexahydro-3*H*-pyrazolo[4'',3''':5',6']pyrano[4',3':5,6]thiochromeno[2,3-*b*]quinoline (5r):**

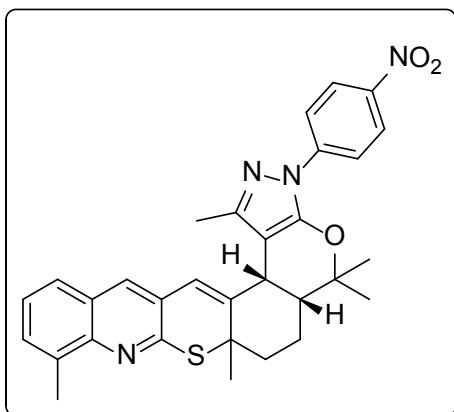

Isolated Yield (1.4 g, 86 %) as yellow crystals, mp 248-250 °C;  $\nu_{\max}/\text{cm}^{-1}$  = 3119.95, 2947.44, 2917.86, 1595.17, 1511.41, 1392.17, 1336.60, 1106.03, 851.67, 750.97, 511.18;  $\delta_{\text{H}}$  (400 MHz,  $\text{CDCl}_3$ ) 1.29 (s, 3H, C(5)CH<sub>3</sub>), 1.57(s, 3H, C(5)CH<sub>3</sub>), 1.65 (s, 3H, C(7a)H), 2.01-2.06 (m, 4H, C(6) & C(7)CH<sub>2</sub>), 2.31 (s, 3H, C(1)CH<sub>3</sub>), 2.40-2.45 (m, 1H, C(5a)H), 2.77 (s, 3H, C(10)CH<sub>3</sub>), 3.71 (d, 1H,  $J$  = 7.2 Hz, C(15b)H), 6.34 (s, 1H, C(15)H), 7.28-8.32 (m, 8H, Ar-H) ppm;  $\delta_{\text{C}}$  (100 MHz;  $\text{CDCl}_3$ ) 13.41, 17.87, 19.10, 20.85, 22.05, 23.33, 28.38, 30.22, 31.81, 33.54, 40.95, 47.78, 48.96, 85.81, 95.49, 117.68, 118.79, 122.39, 124.76, 125.01, 125.71, 125.87, 126.68, 132.90, 135.91, 142.16, 143.97, 146.31, 149.68 ppm;  $m/z$  (ESI) 538.7 [M + H<sup>+</sup>].

## 1.6 Single crystal X-Ray data

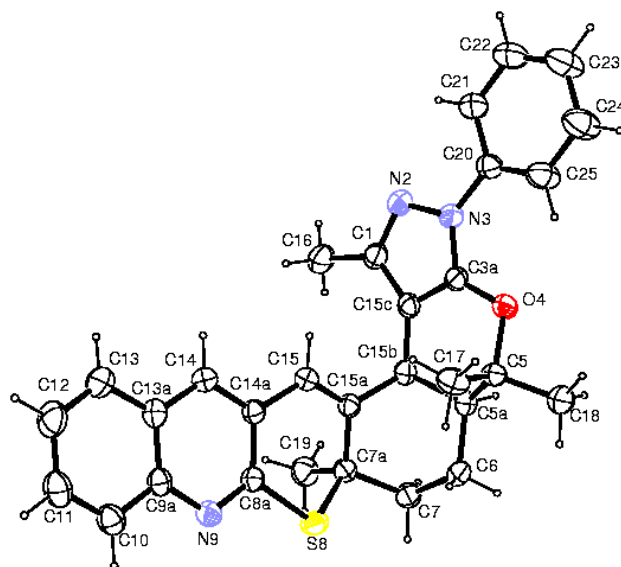

Figure 3: *ORTEP* view of the molecule 5a.

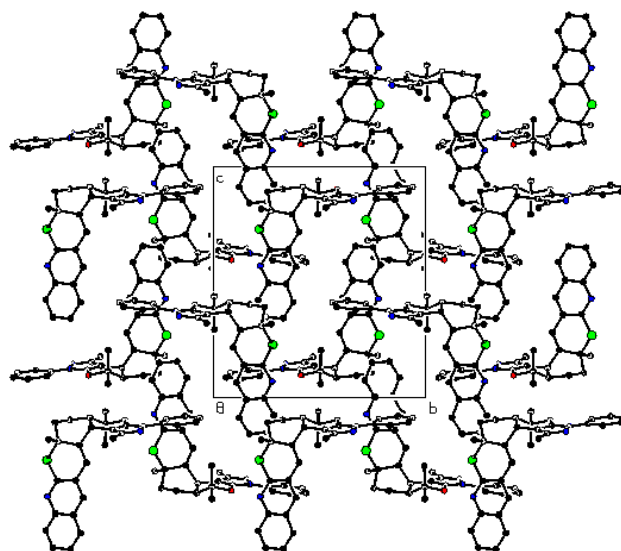

Figure 4: The packing arrangement of molecules 5a



**Table 1 Crystal and experimental data of 5a**

|                                                       |                                                                       |
|-------------------------------------------------------|-----------------------------------------------------------------------|
| CCDC No                                               | 914747                                                                |
| Crystal description                                   | yellow block                                                          |
| Crystal size                                          | 0.30 x 0.20 x 0.20 mm                                                 |
| Empirical formula                                     | C <sub>30</sub> H <sub>29</sub> N <sub>3</sub> OS                     |
| Formula weight                                        | 479.62                                                                |
| Radiation, Wavelength                                 | Mo K $\alpha$ , 0.71073 Å                                             |
| Unit cell dimensions                                  | a=10.3294(2), b= 14.8602(4), c=19.1562(4)<br>Å, $\beta$ =122.631(1) ° |
| Crystal system                                        | Monoclinic                                                            |
| Space group                                           | P 2 <sub>1</sub> /c                                                   |
| Unit cell volume                                      | 2476.30(10) Å <sup>3</sup>                                            |
| No. of molecules per unit cell, Z                     | 4                                                                     |
| Absorption coefficient( $\mu$ )                       | 0.159 mm <sup>-1</sup>                                                |
| F (000)                                               | 1016                                                                  |
| $\theta$ range for entire data collection             | 3.38 < $\theta$ < 26.00                                               |
| Reflections collected / unique                        | 74367 / 4863                                                          |
| Reflections observed [I > 2 $\sigma$ (I)]             | 3823                                                                  |
| No. of parameters refined                             | 320                                                                   |
| Final R                                               | 0.0436                                                                |
| wR(F <sup>2</sup> )                                   | 0.0979                                                                |
| Goodness-of-fit                                       | 1.040                                                                 |
| ( $\Delta/\sigma$ ) <sub>max</sub> in the final cycle | 0.001                                                                 |
| Final residual electron density                       | -0.227 < $\Delta\rho$ < 0.222 eÅ <sup>-3</sup>                        |

## 1.7 2D NMR experiments: NOE and Cosy for 5a

### NOE for 5a

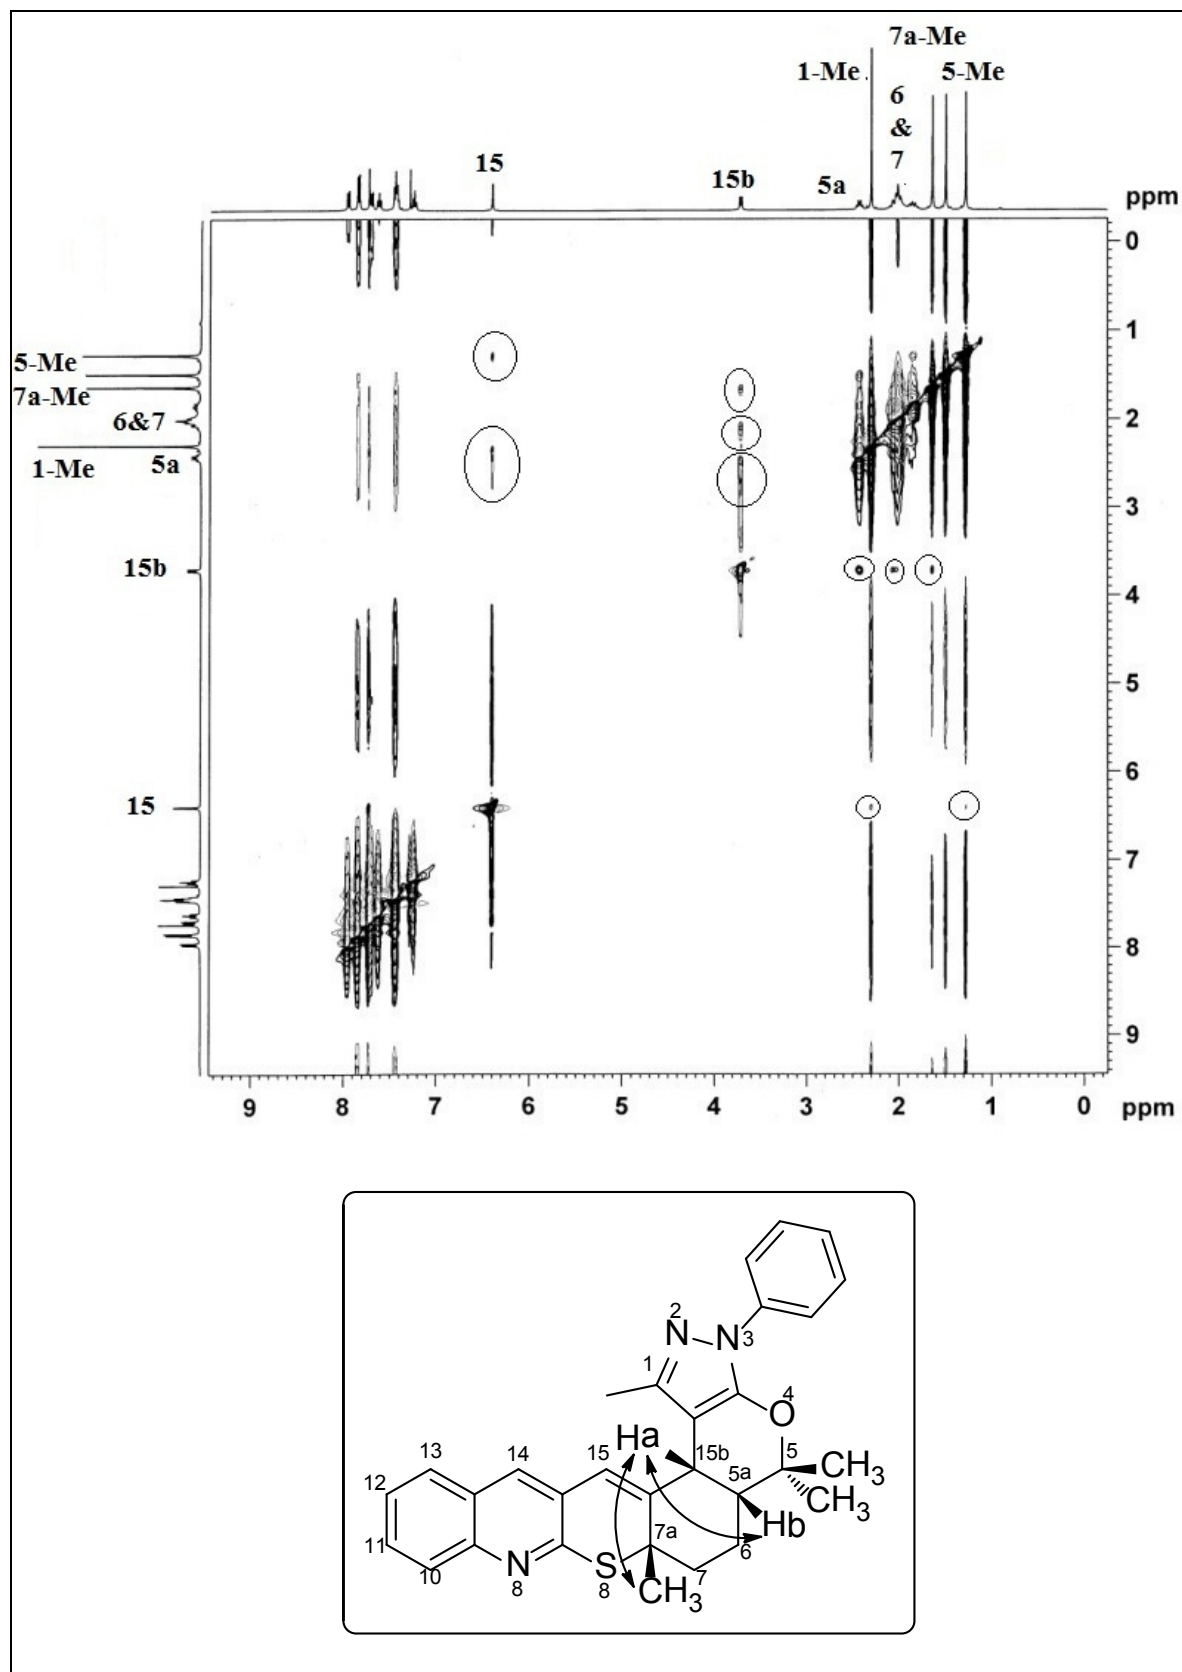

### Cosy for 5a

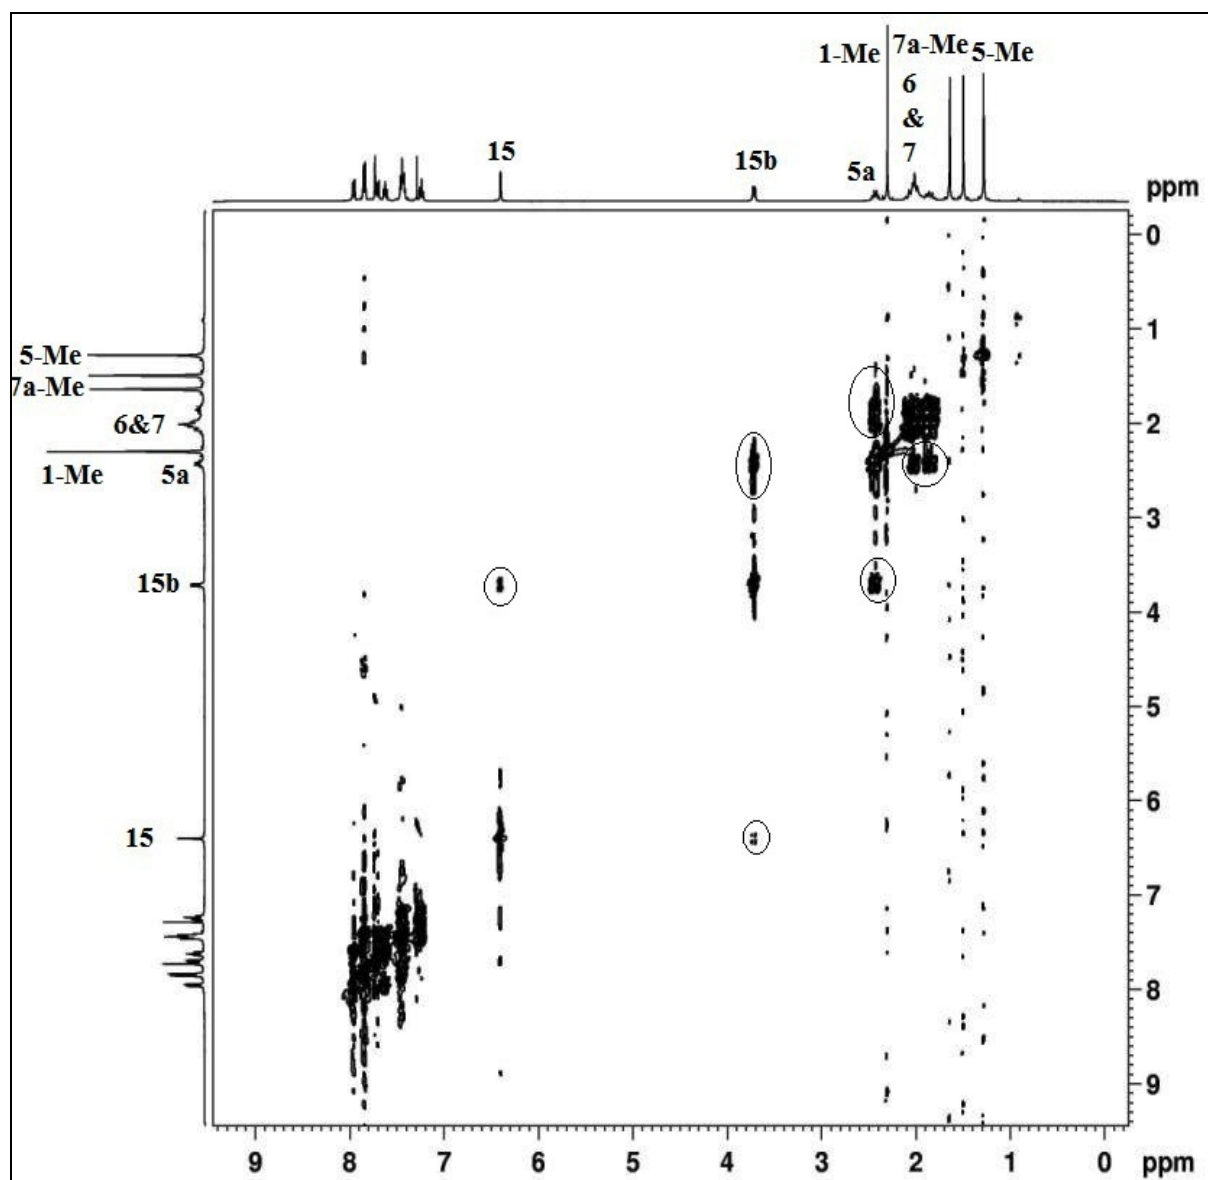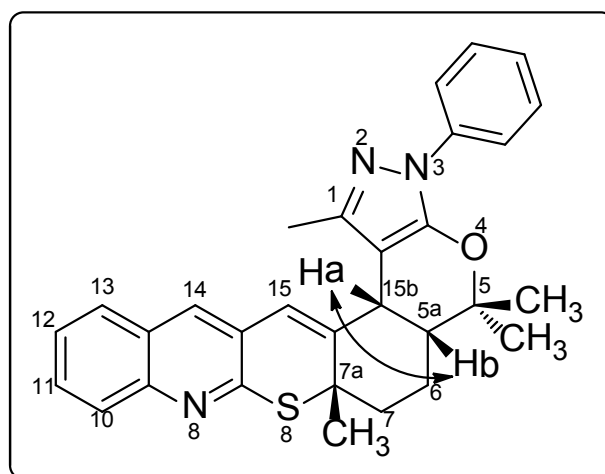

### 1.8 <sup>1</sup>H NMR, <sup>13</sup>C NMR, Mass and IR Spectral Data

<sup>1</sup>H NMR spectrum of compo und 3a

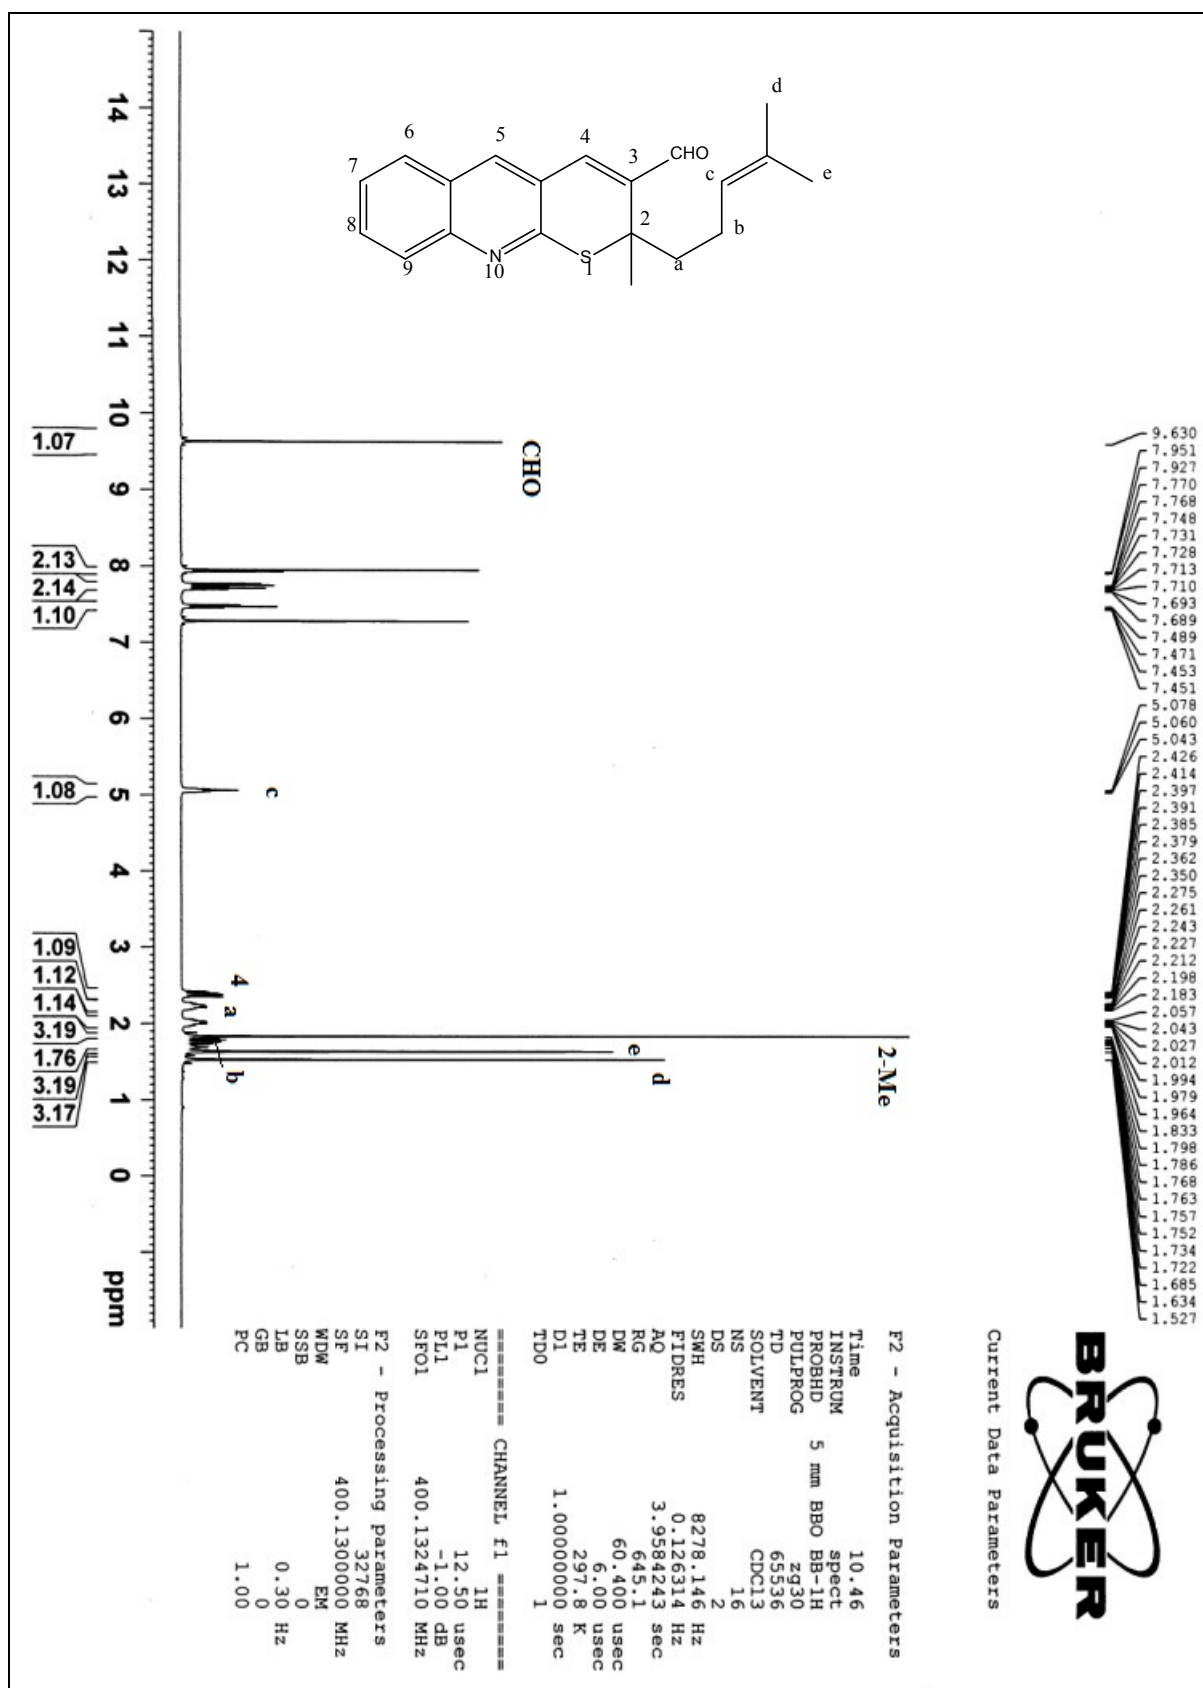

APT spectrum of compound 3a

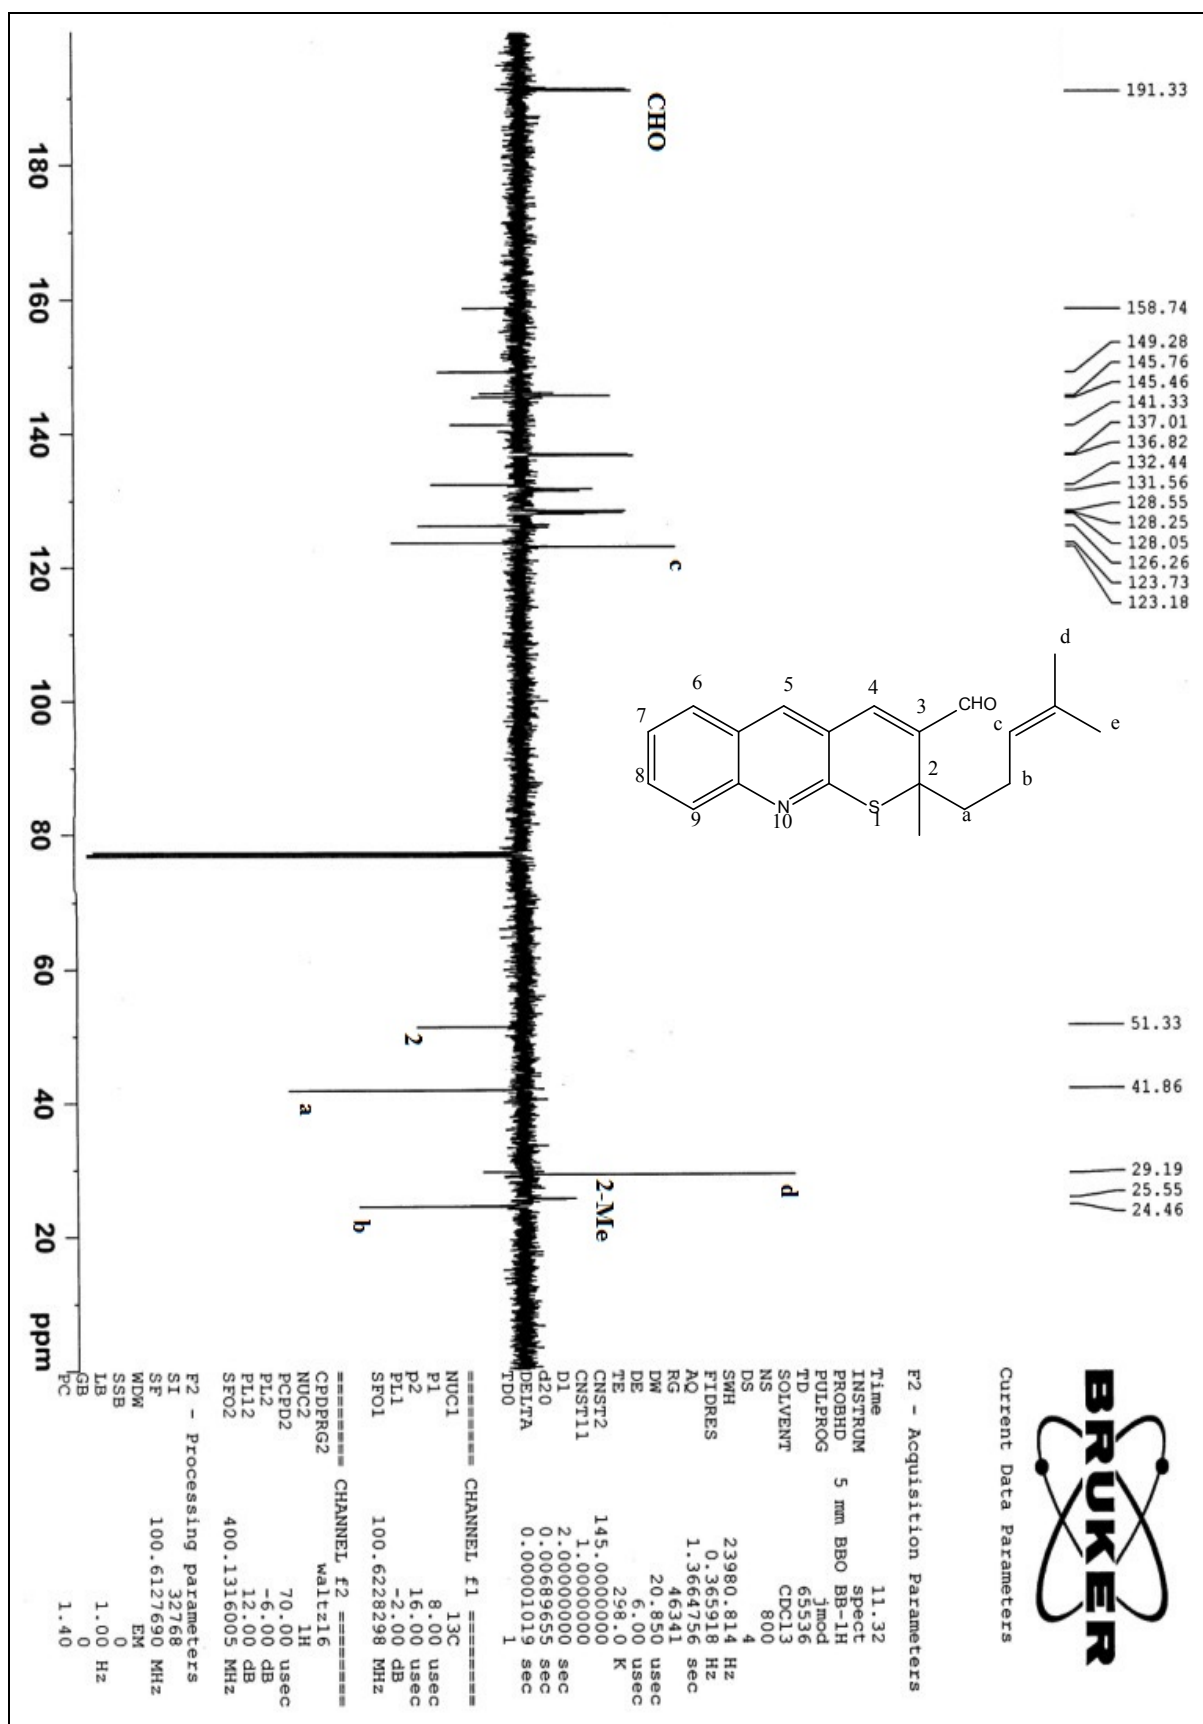

### ESI-MS of compound 3a

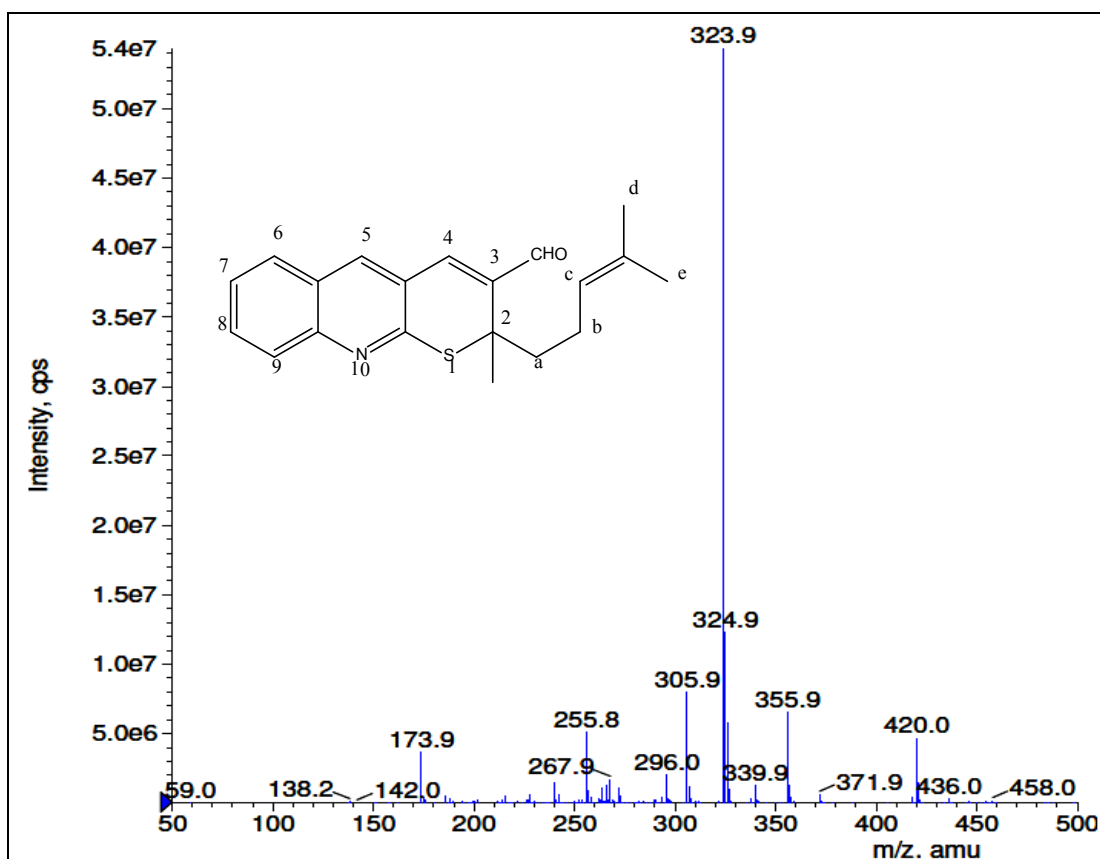

### FT-IR spectrum of compound 3a

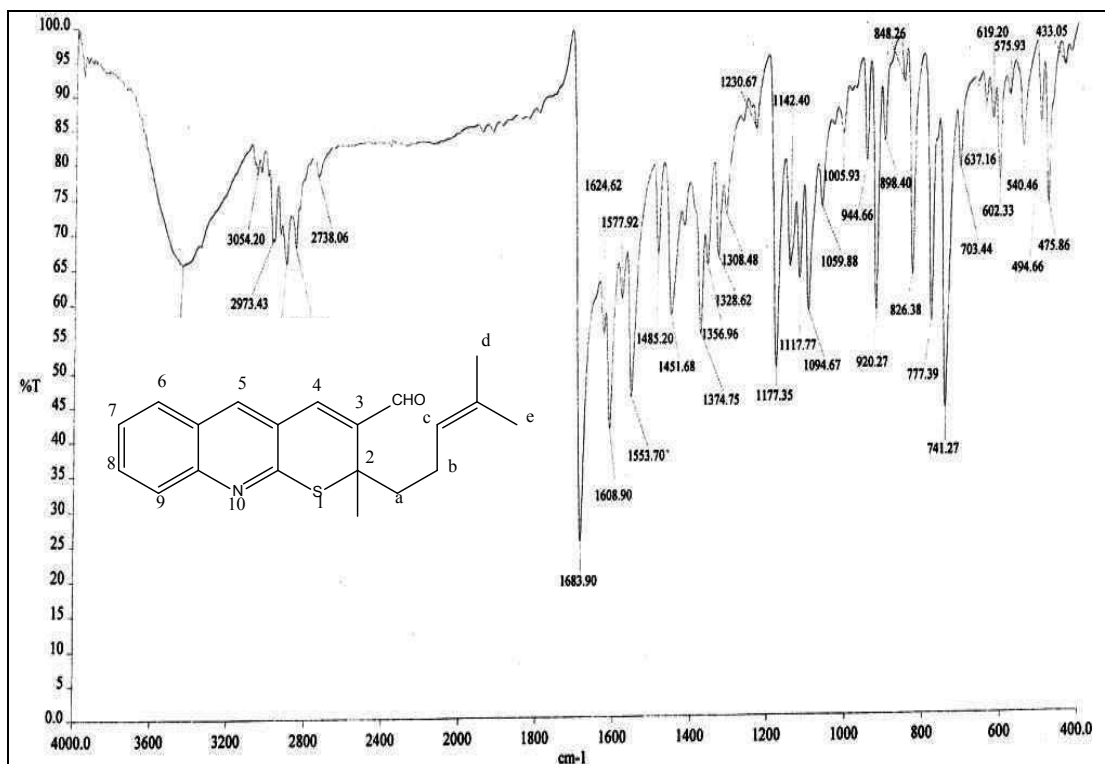

<sup>1</sup>H NMR spectrum of compound 5a

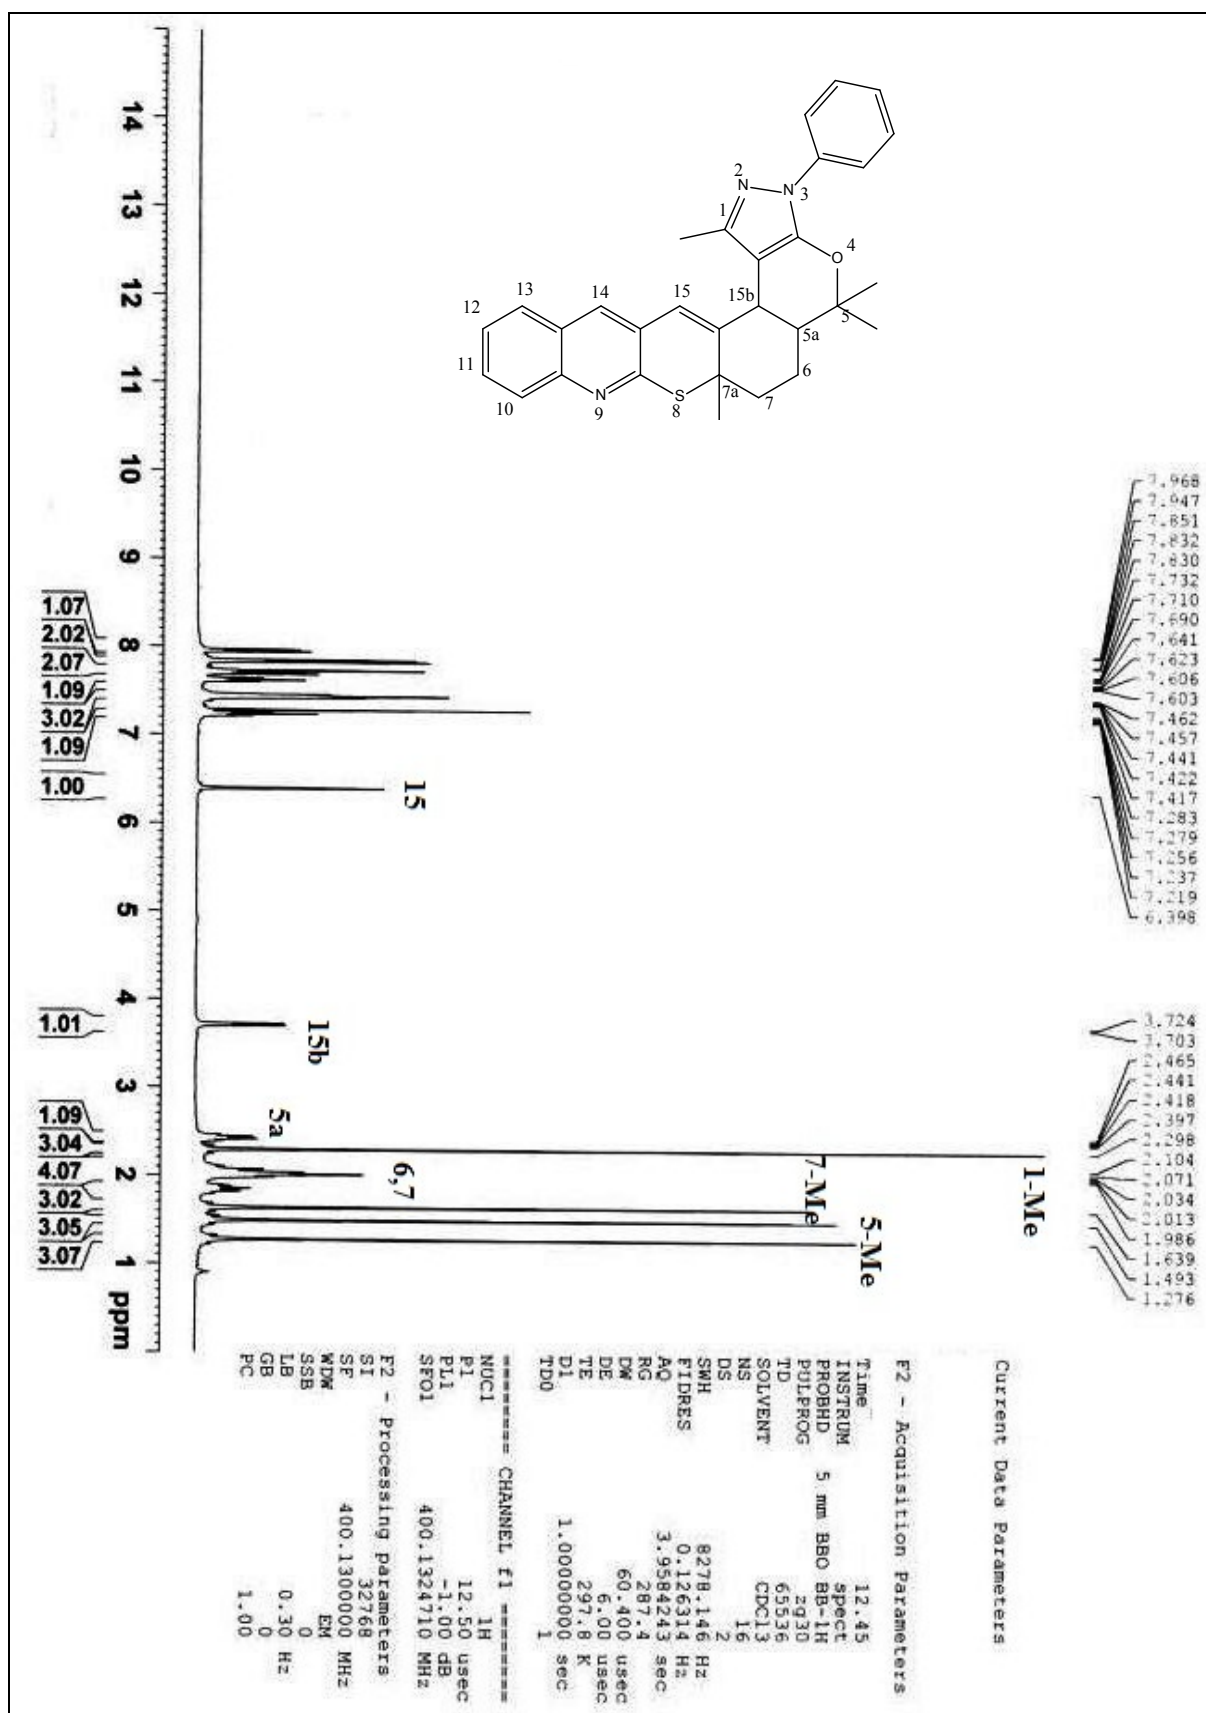

<sup>13</sup>C NMR spectrum of compound 5a

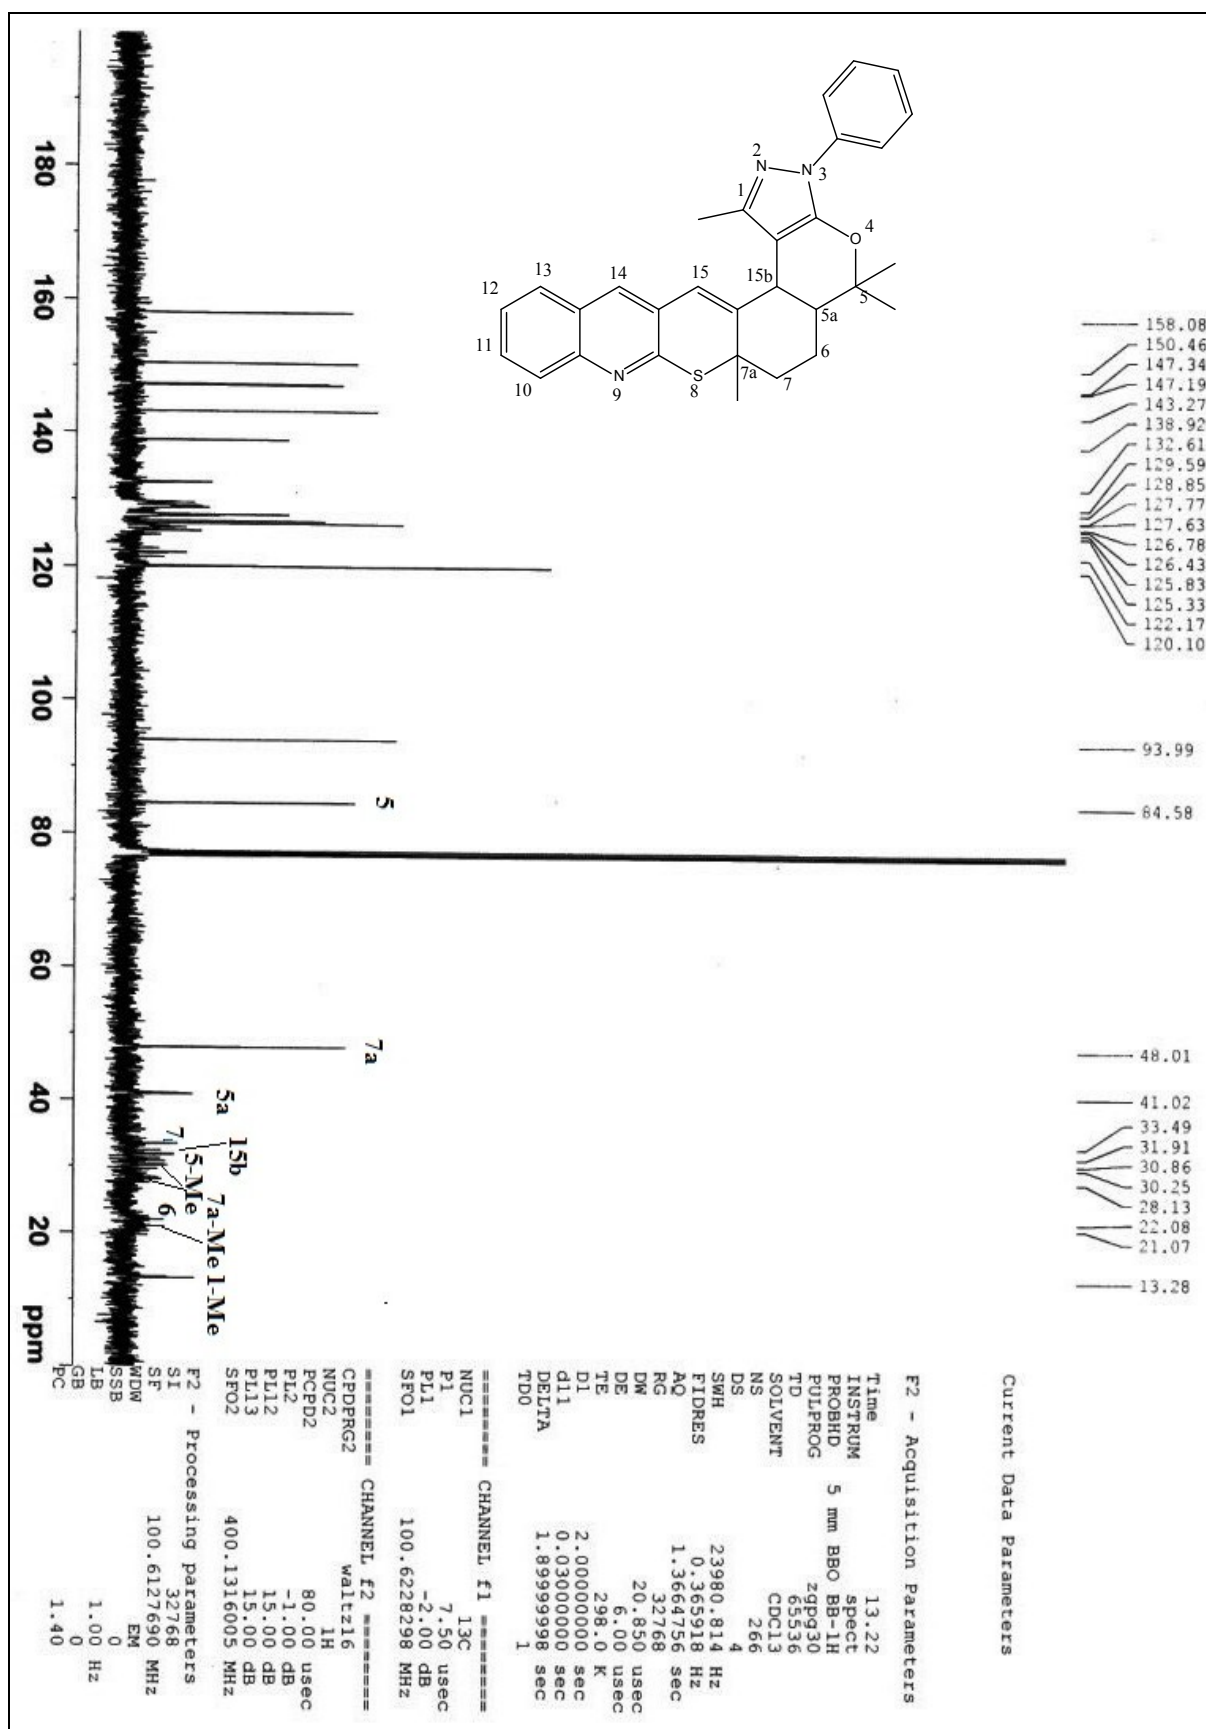



DEPT-135 spectrum of compound 5a

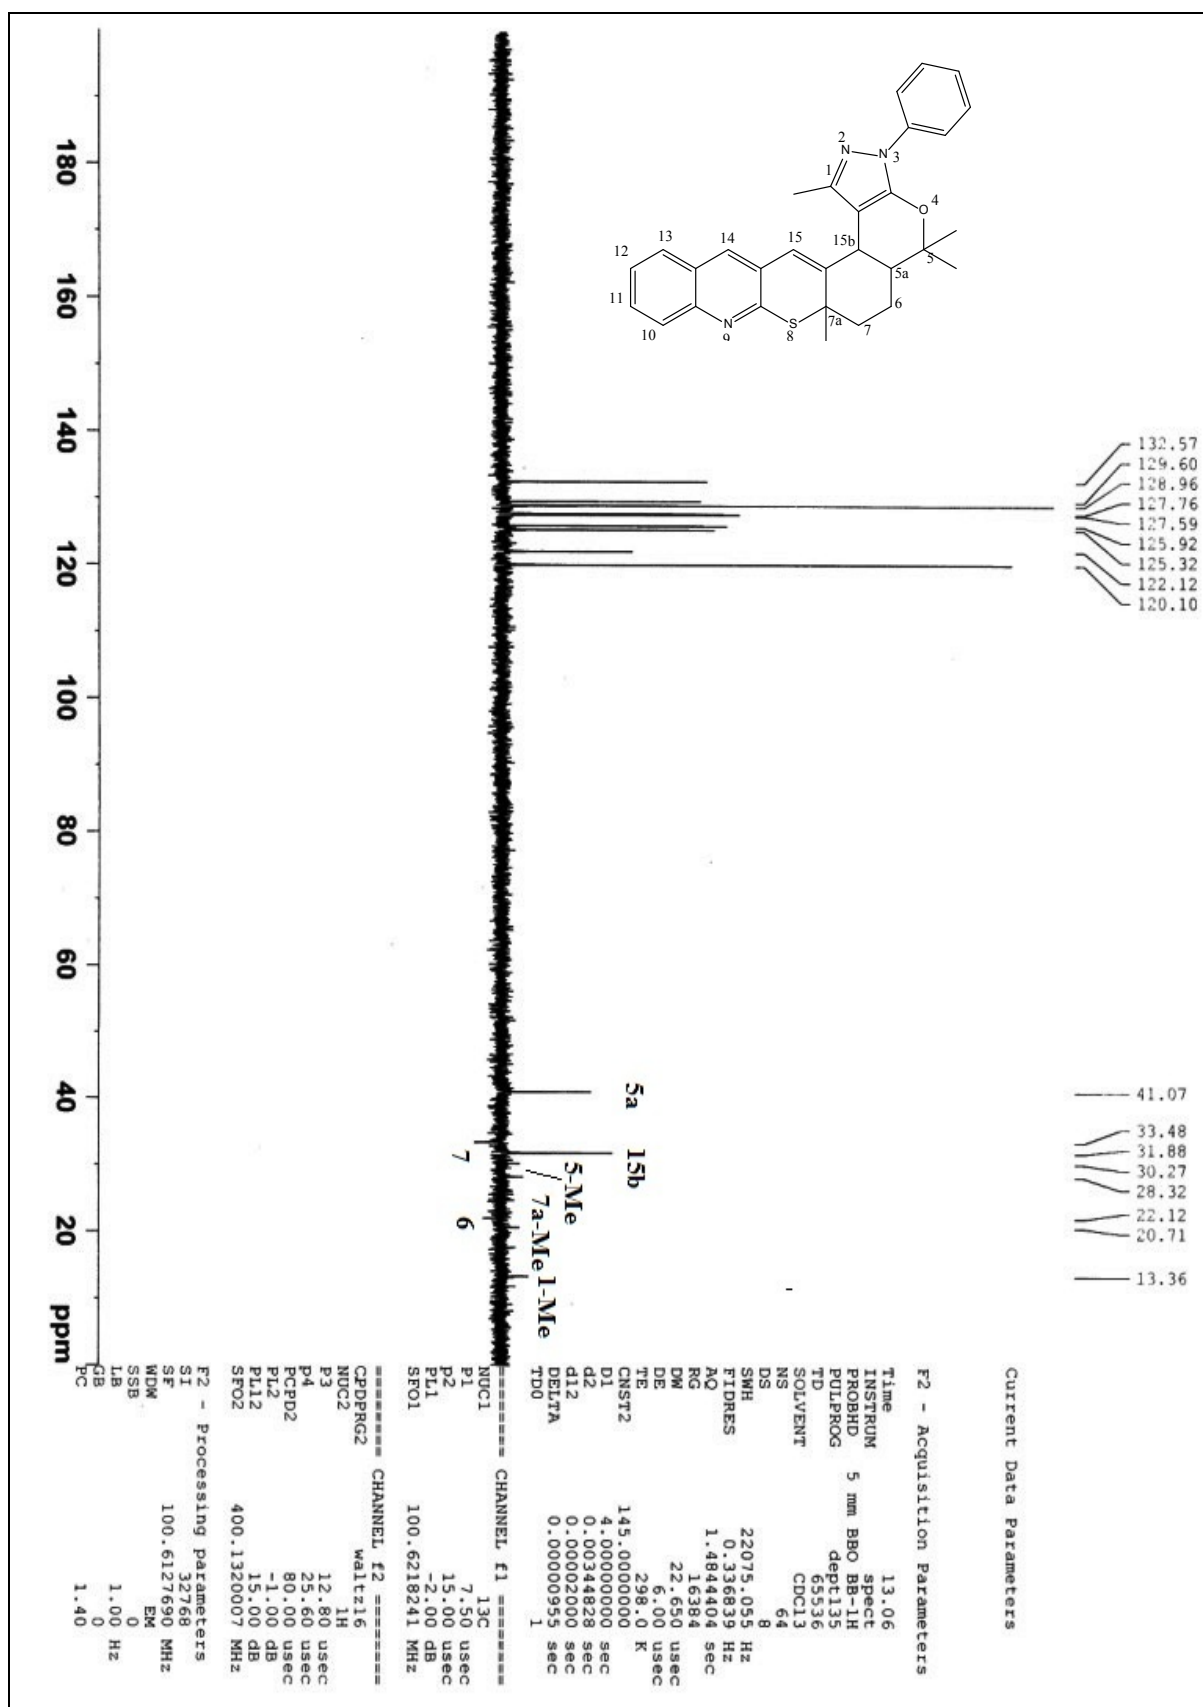

### ESI-MS of compound 5a

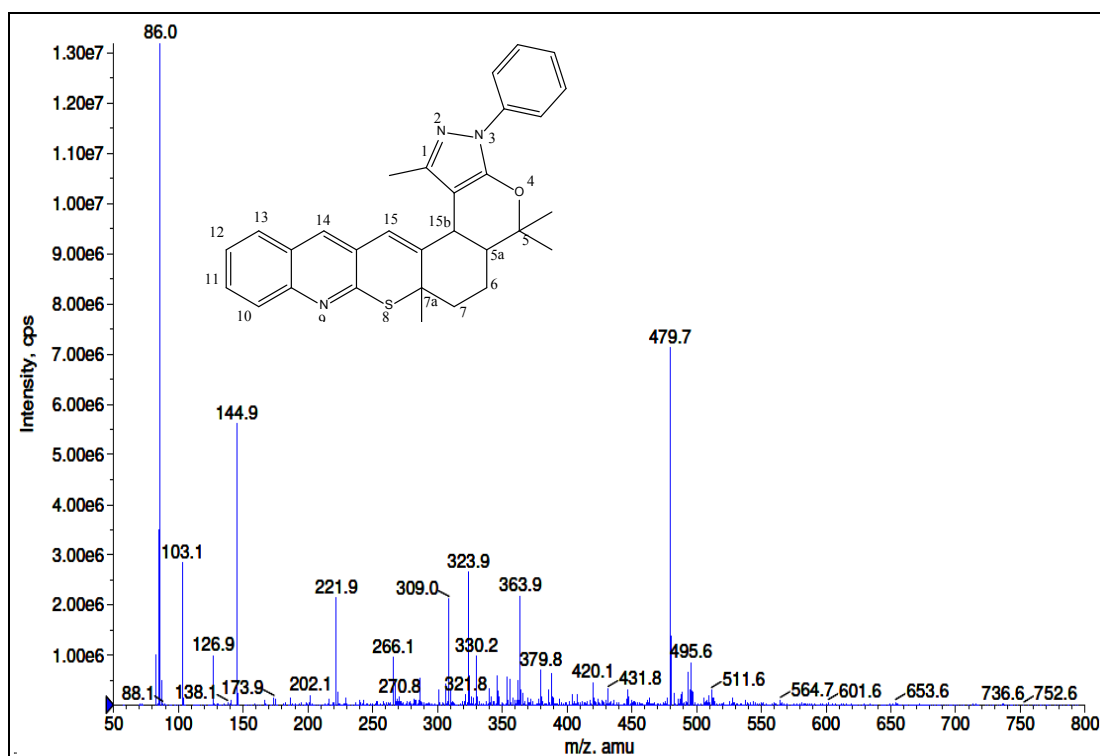

### FT-IR spectrum of compound 5a

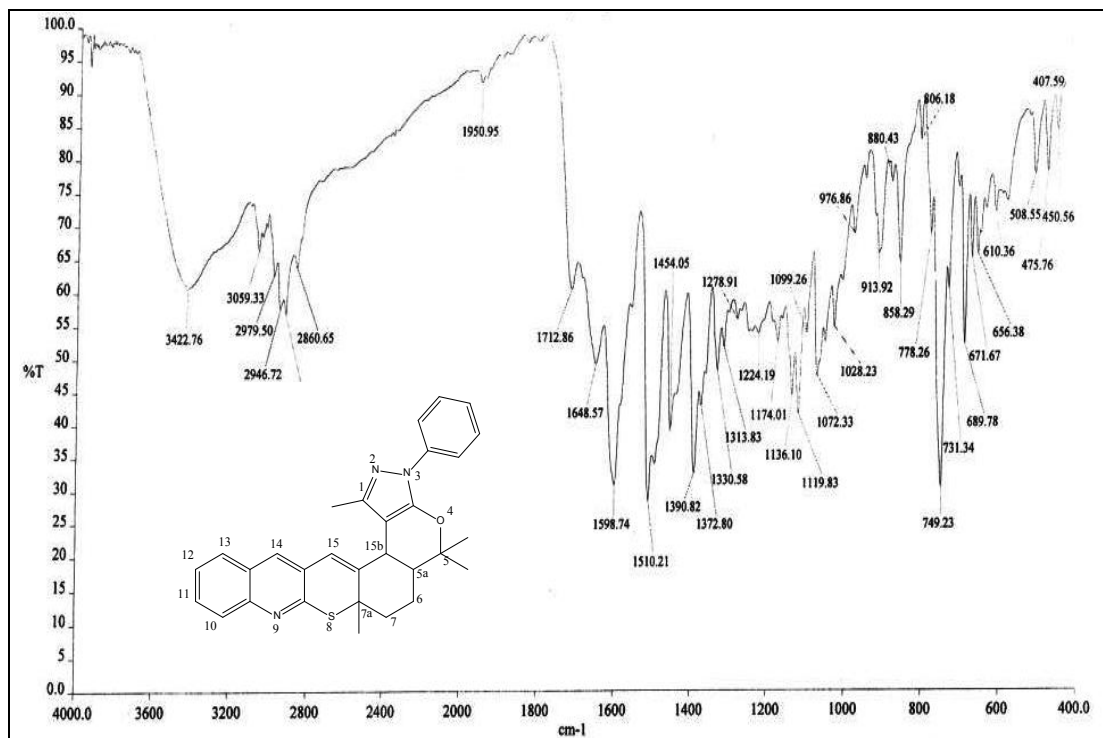

<sup>1</sup>H NMR spectrum of compound 5b

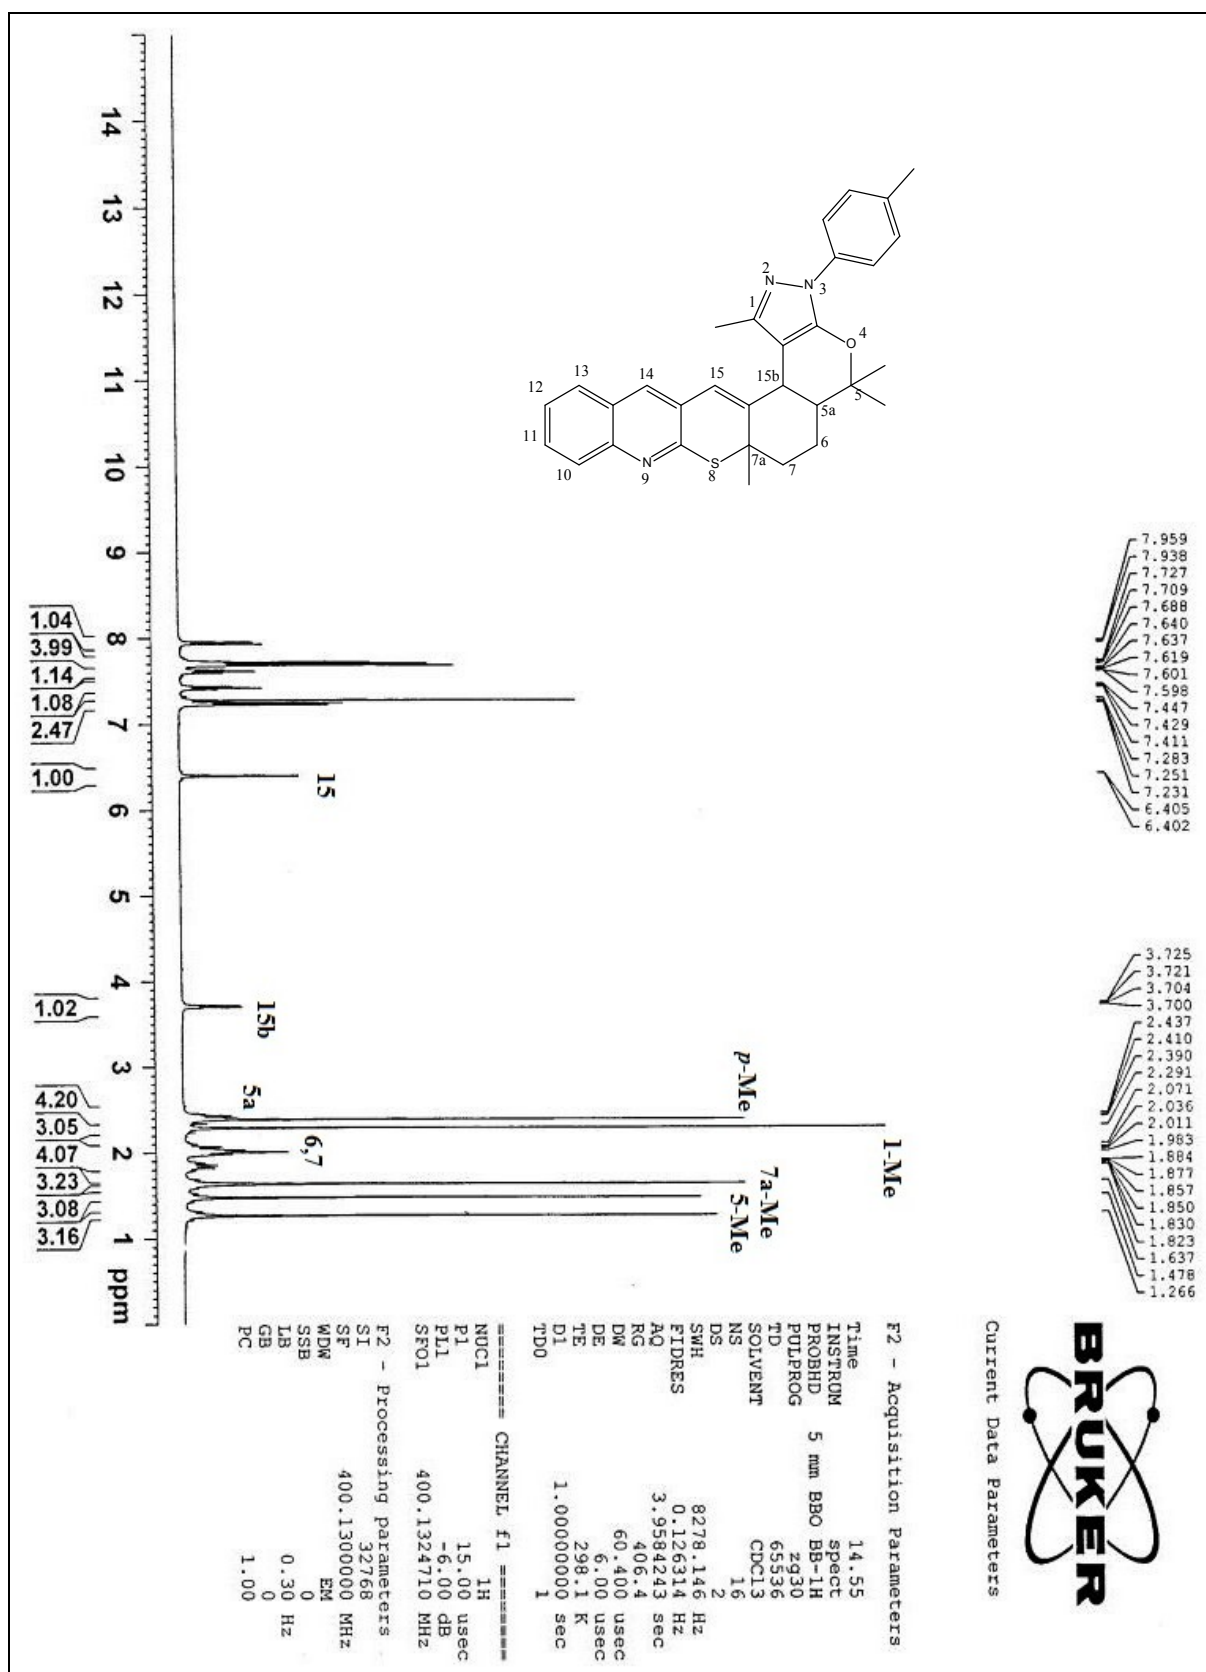

APT spectrum of compound 5b

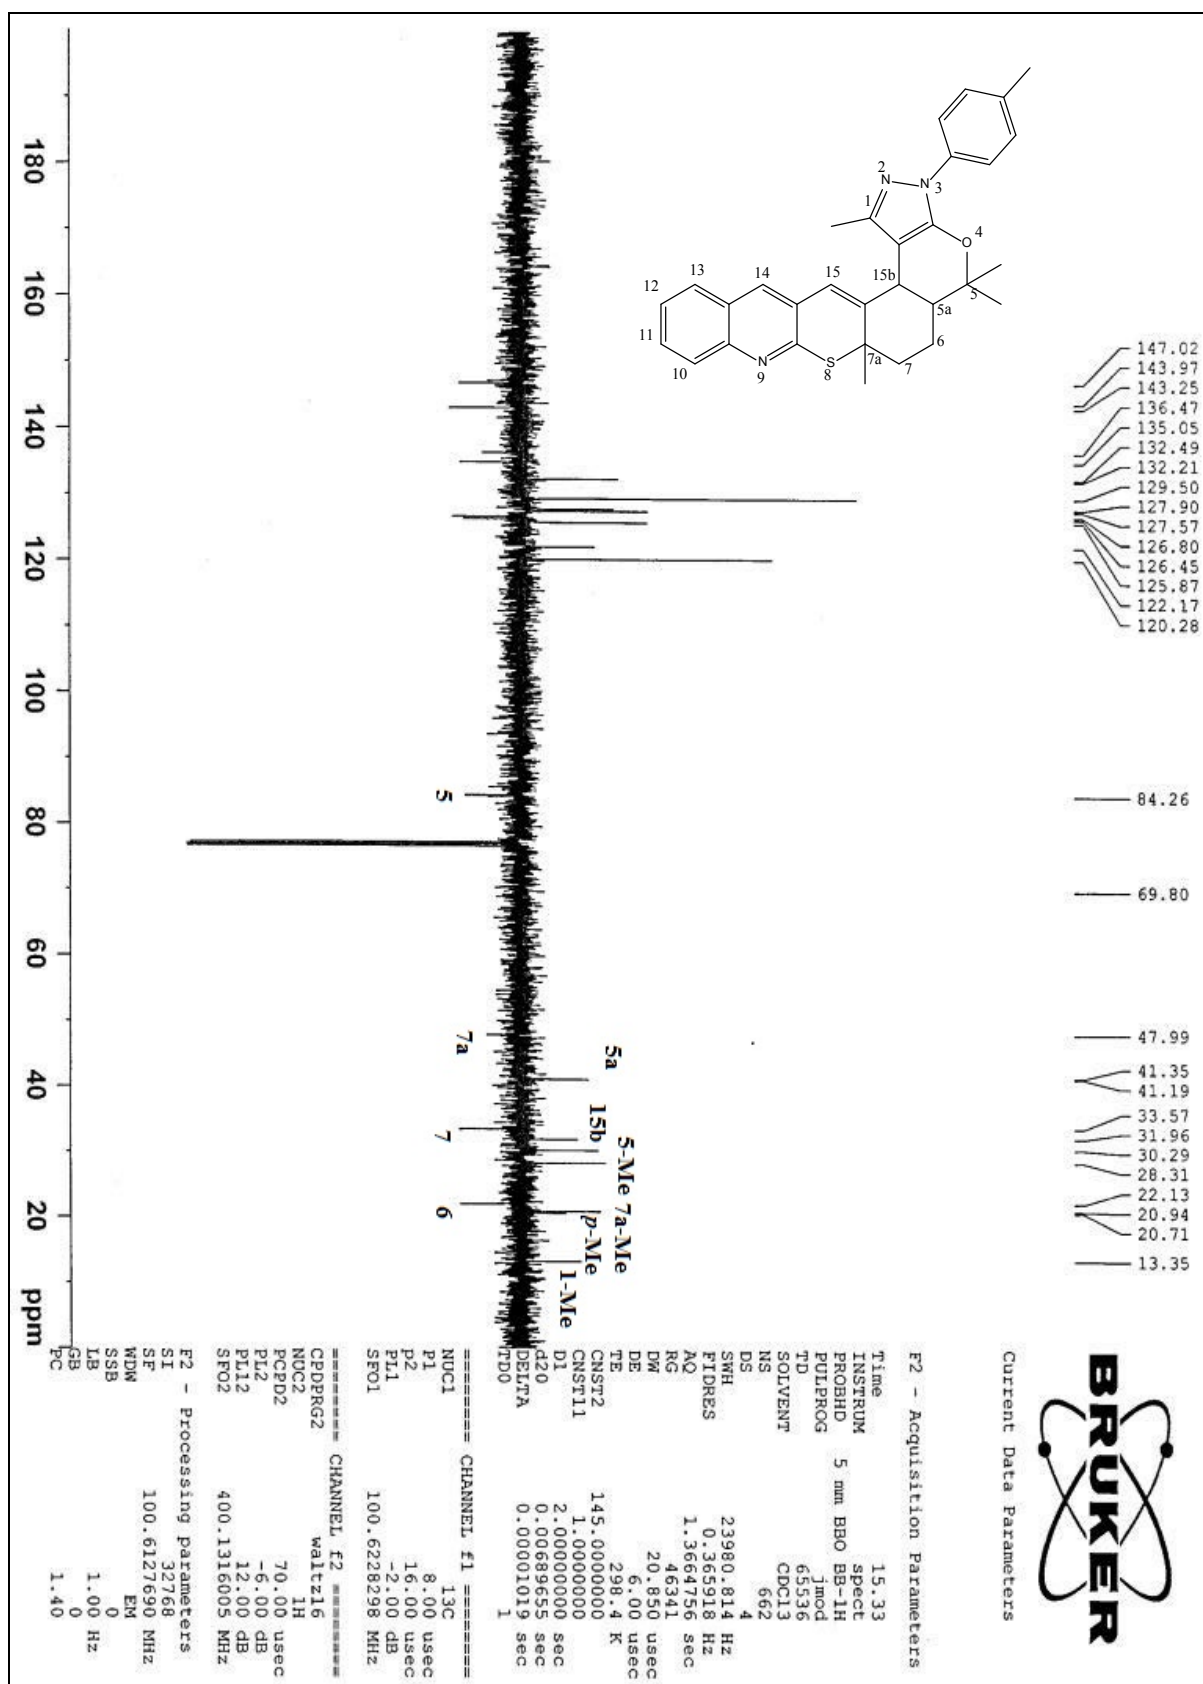

FT-IR spectrum of compound 5b

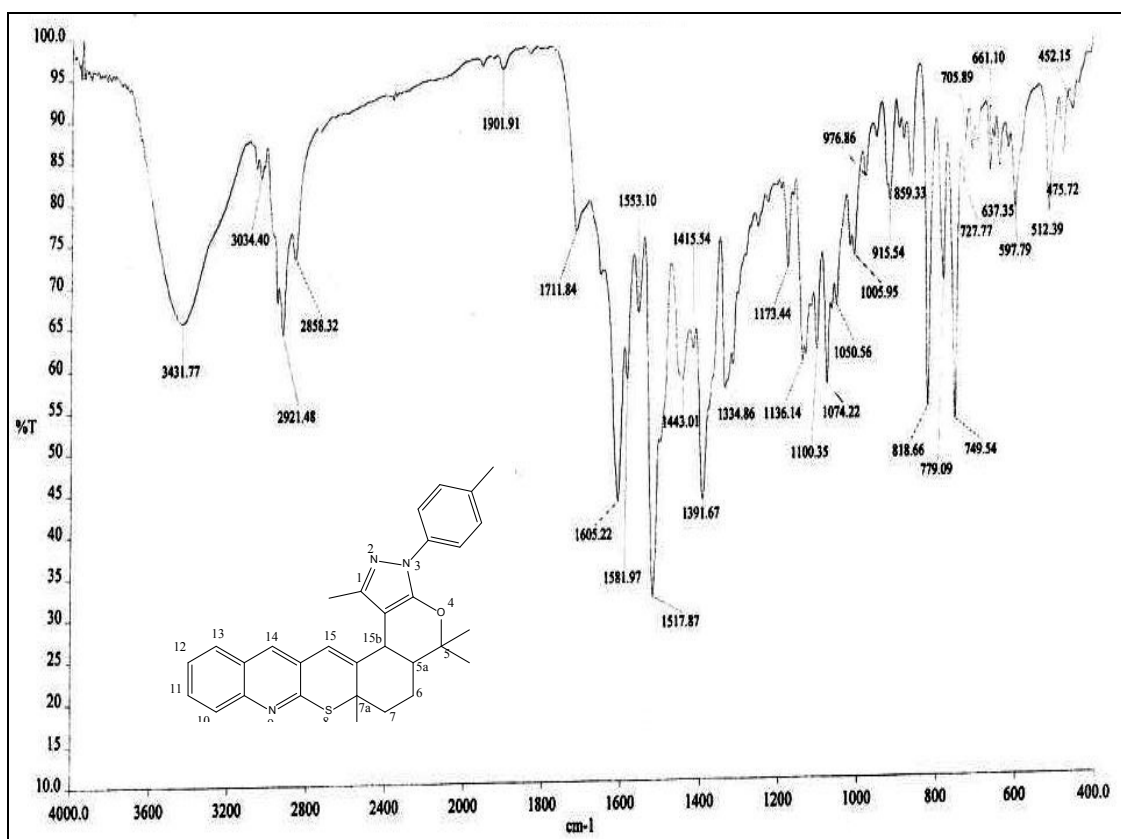

FT-IR spectrum of compound 5d

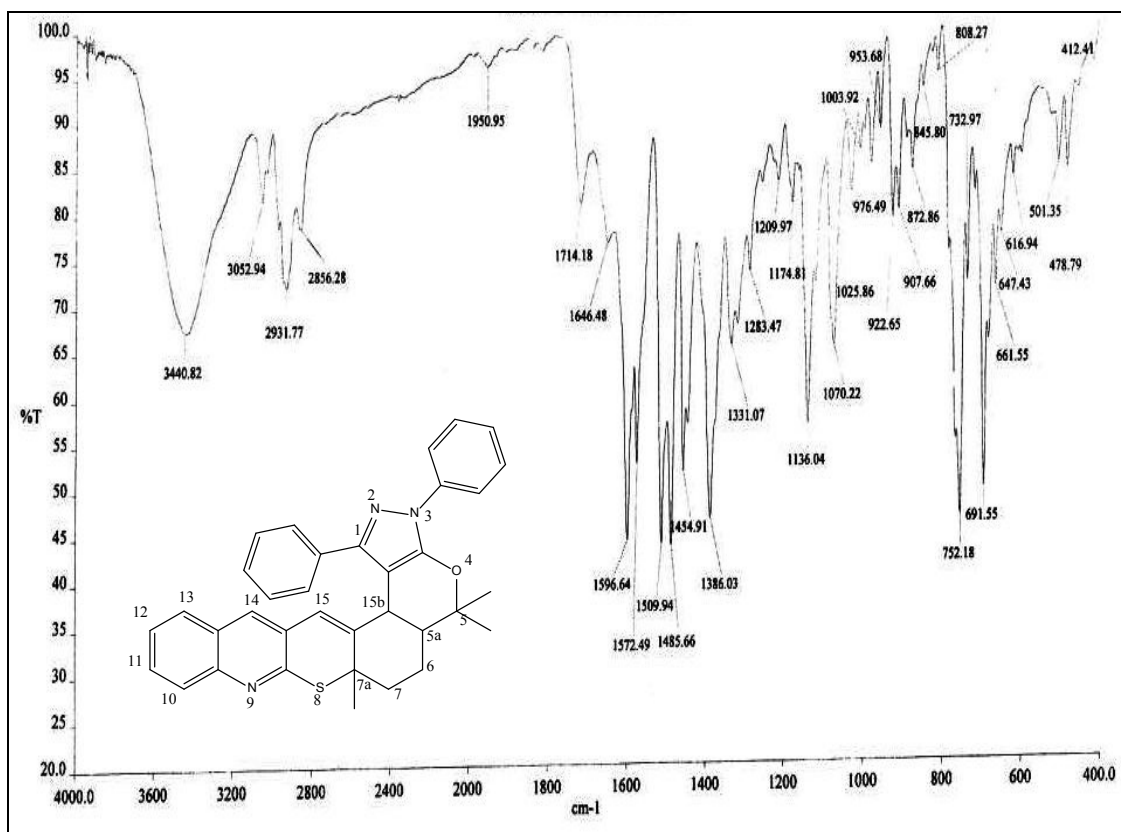

<sup>1</sup>H NMR spectrum of compound 5d

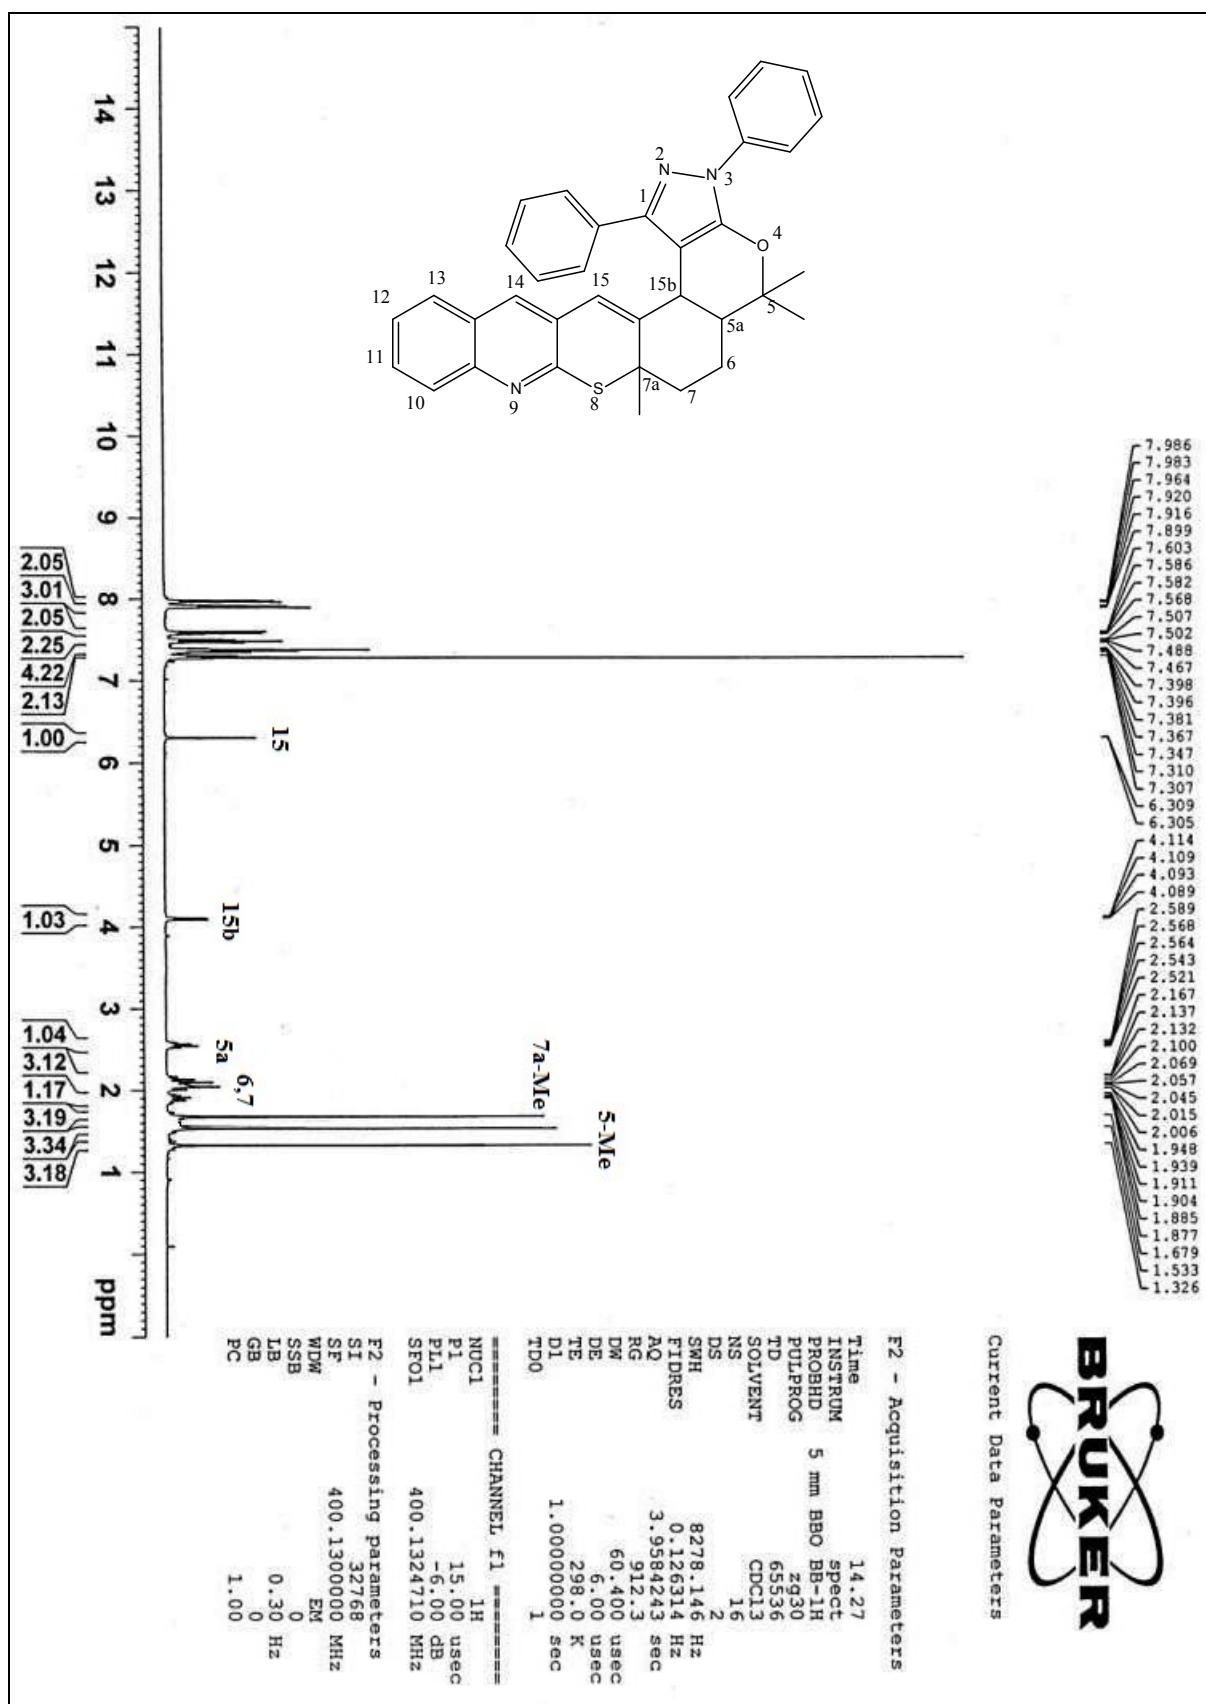

<sup>1</sup>H NMR spectrum of compound 5i

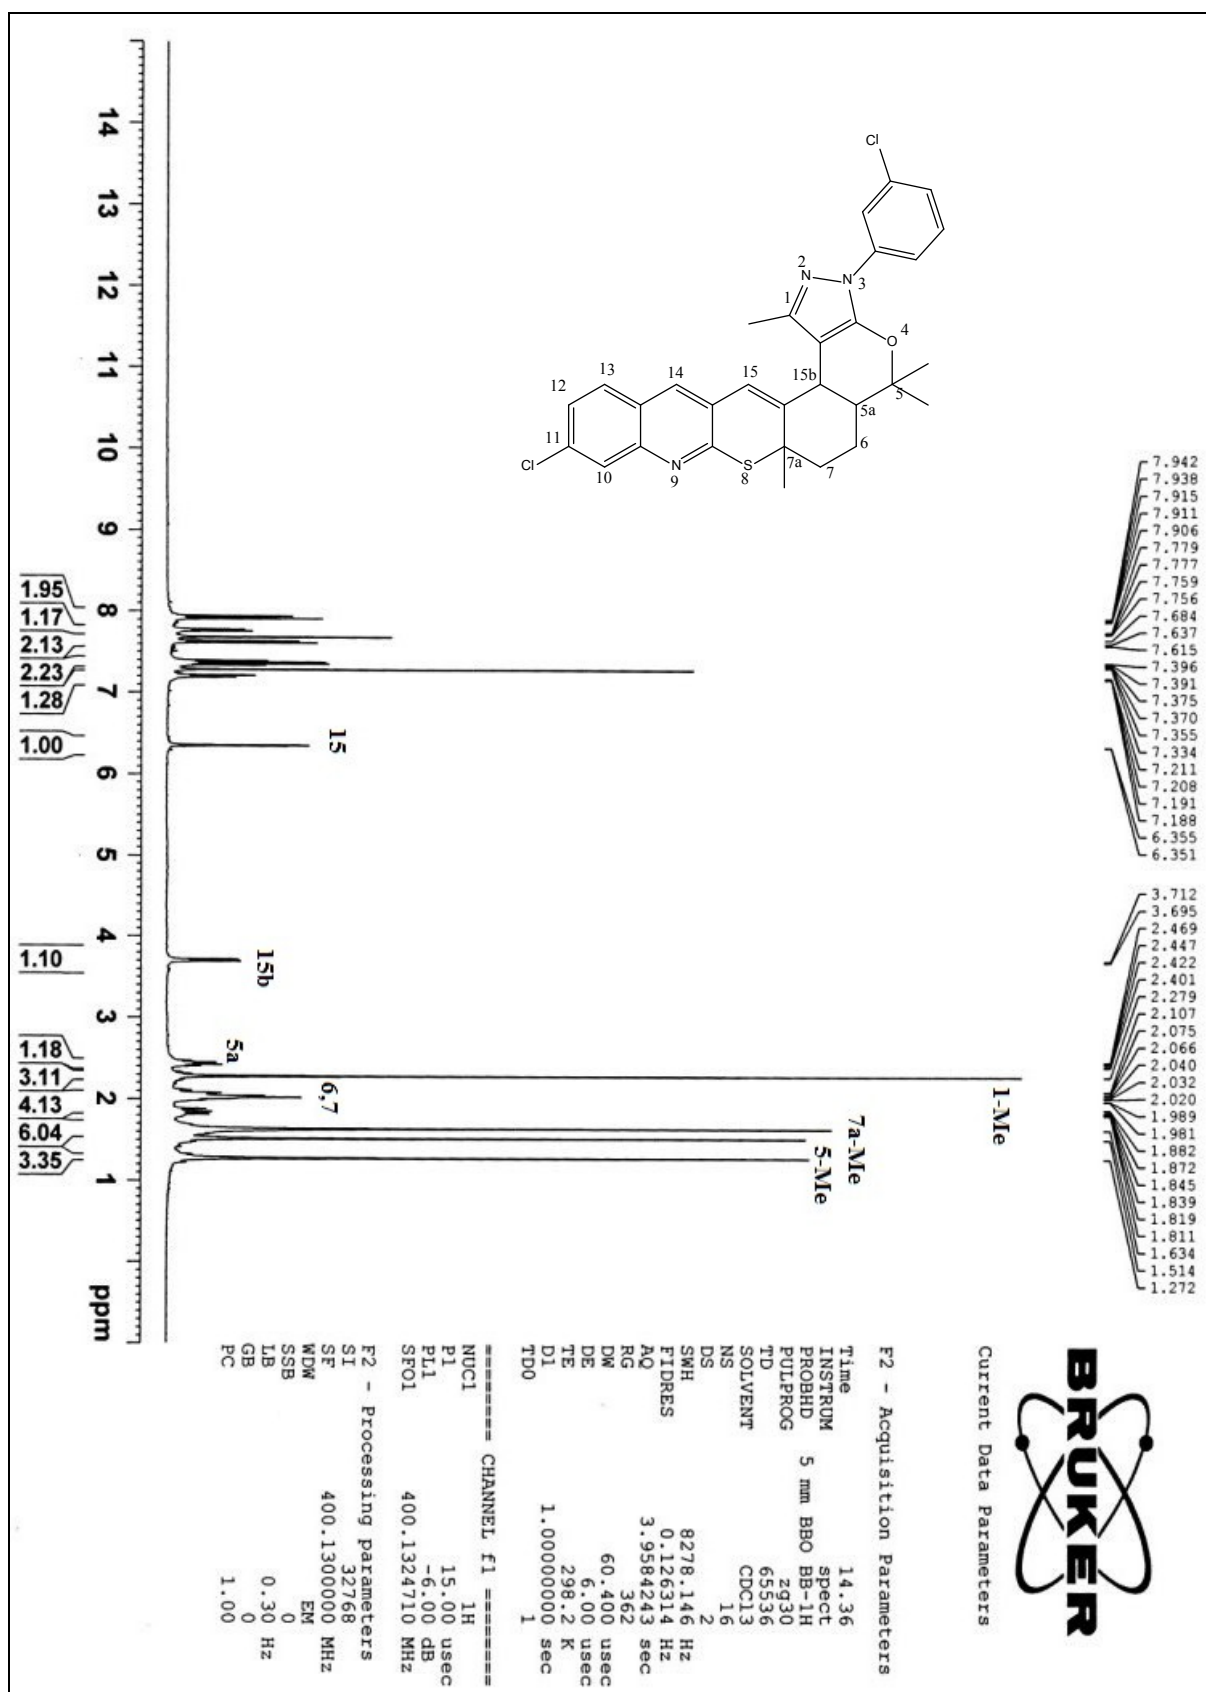

APT spectrum of compound 5i

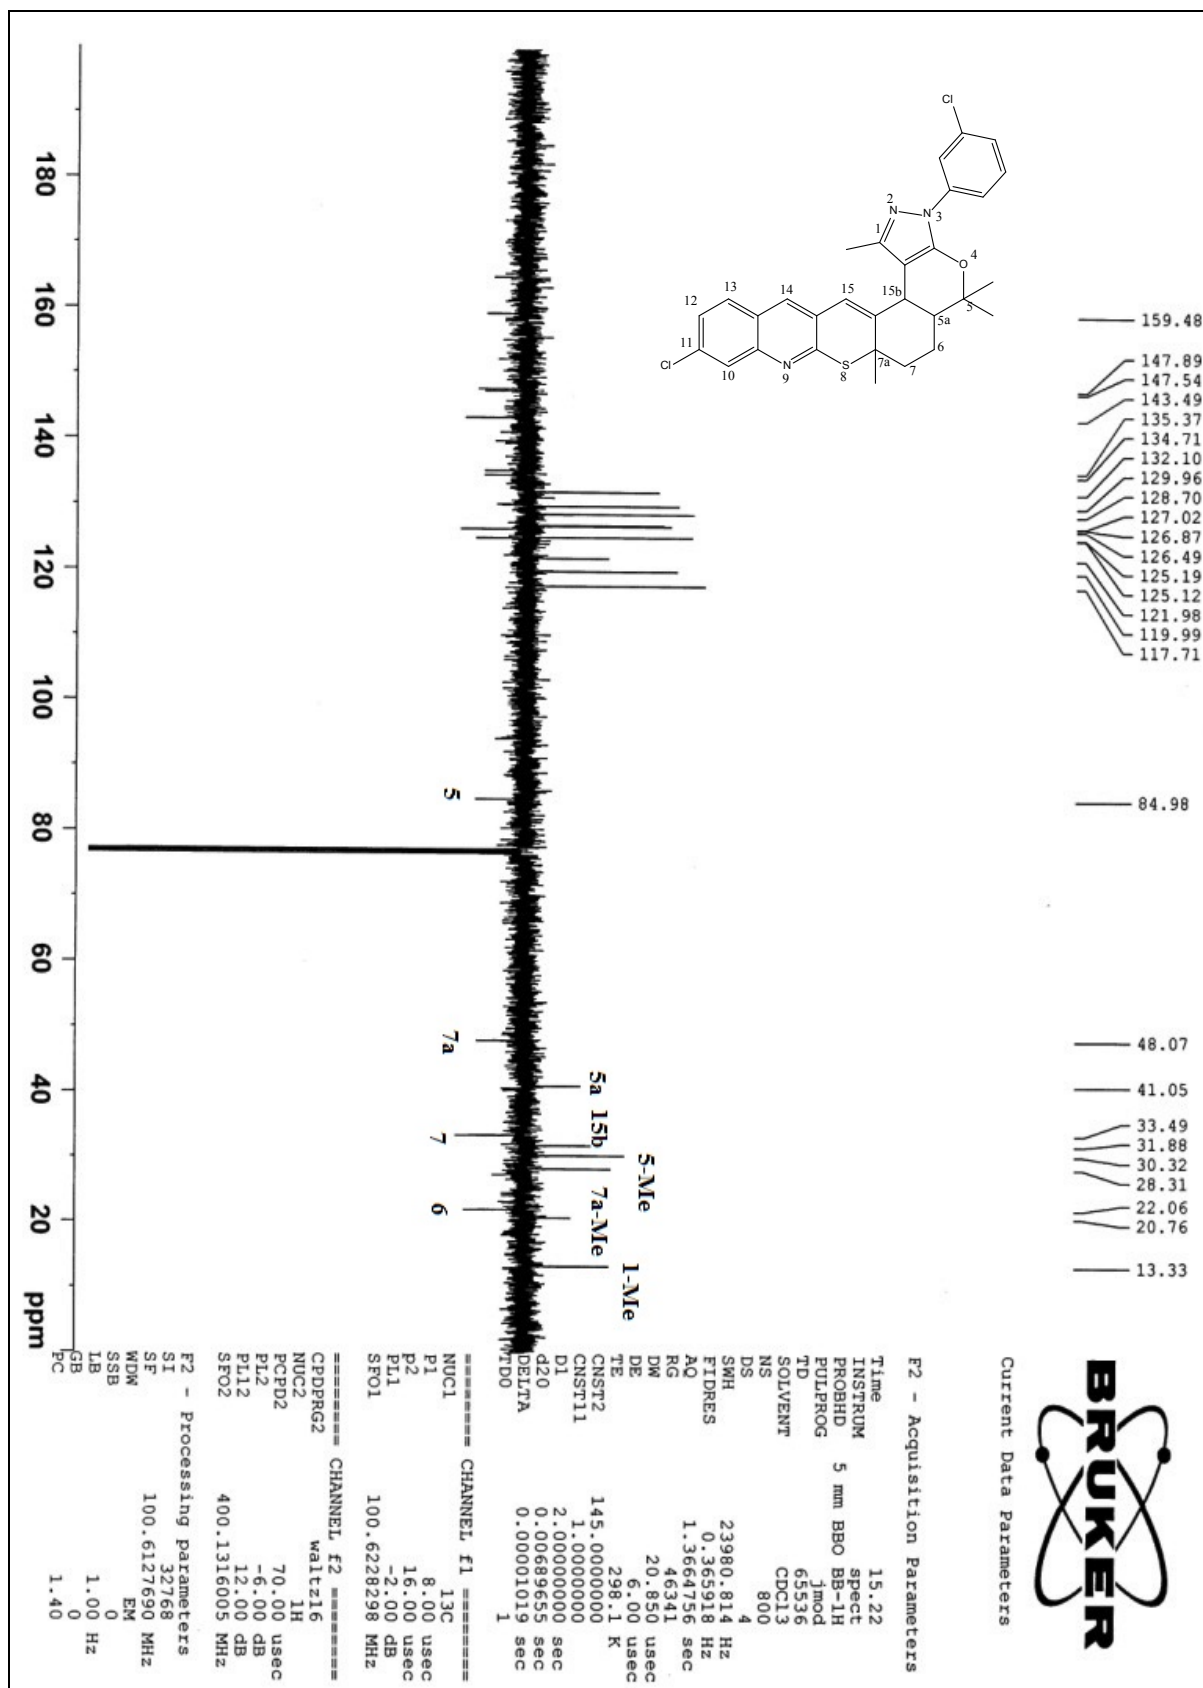



### ESI-MS of compound 5i

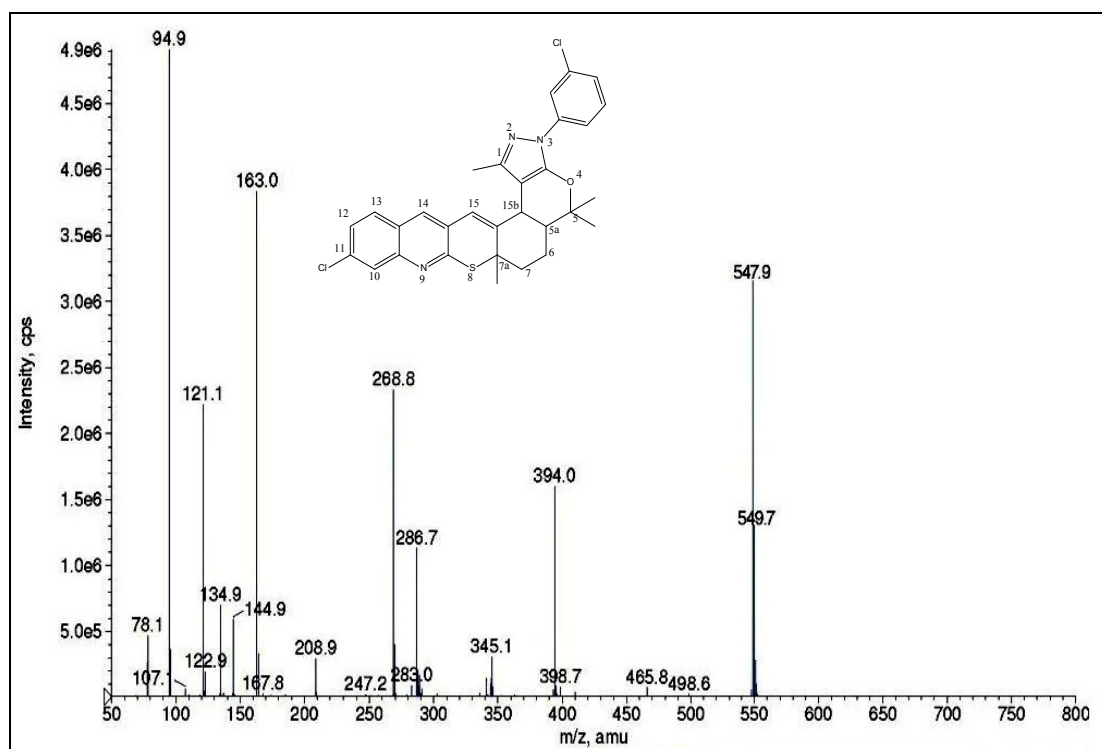

### FT-IR spectrum of compound 5i

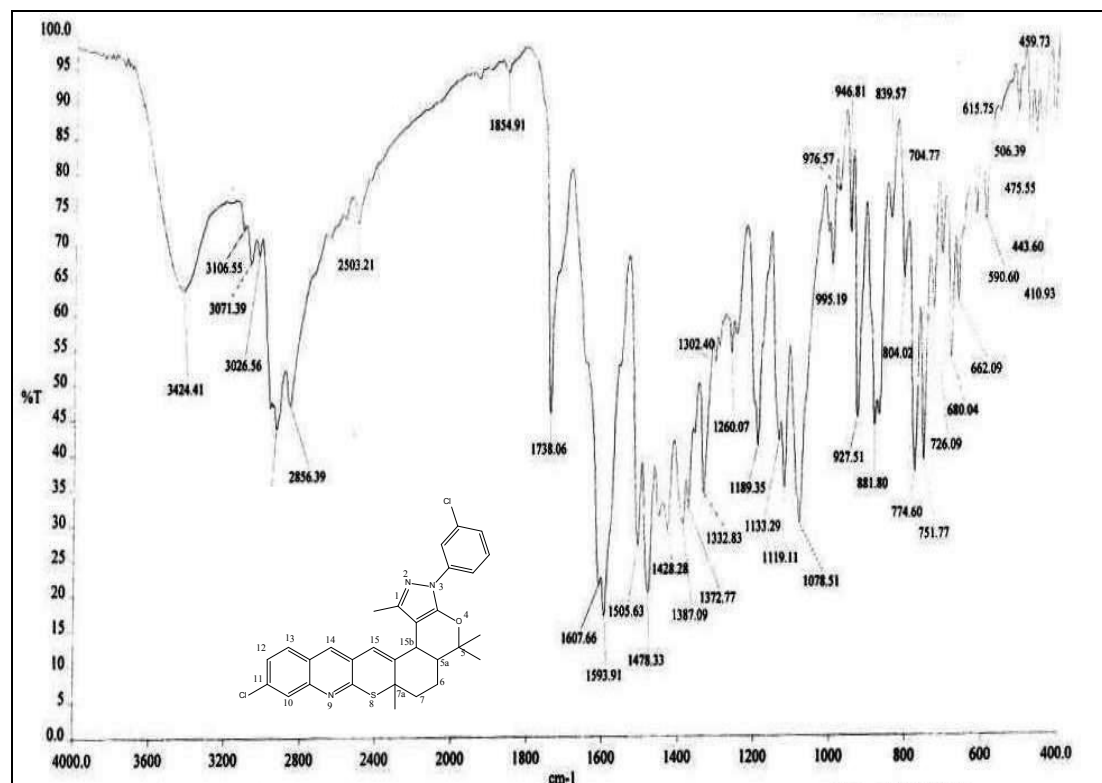

<sup>1</sup>H NMR spectrum of compound 5k

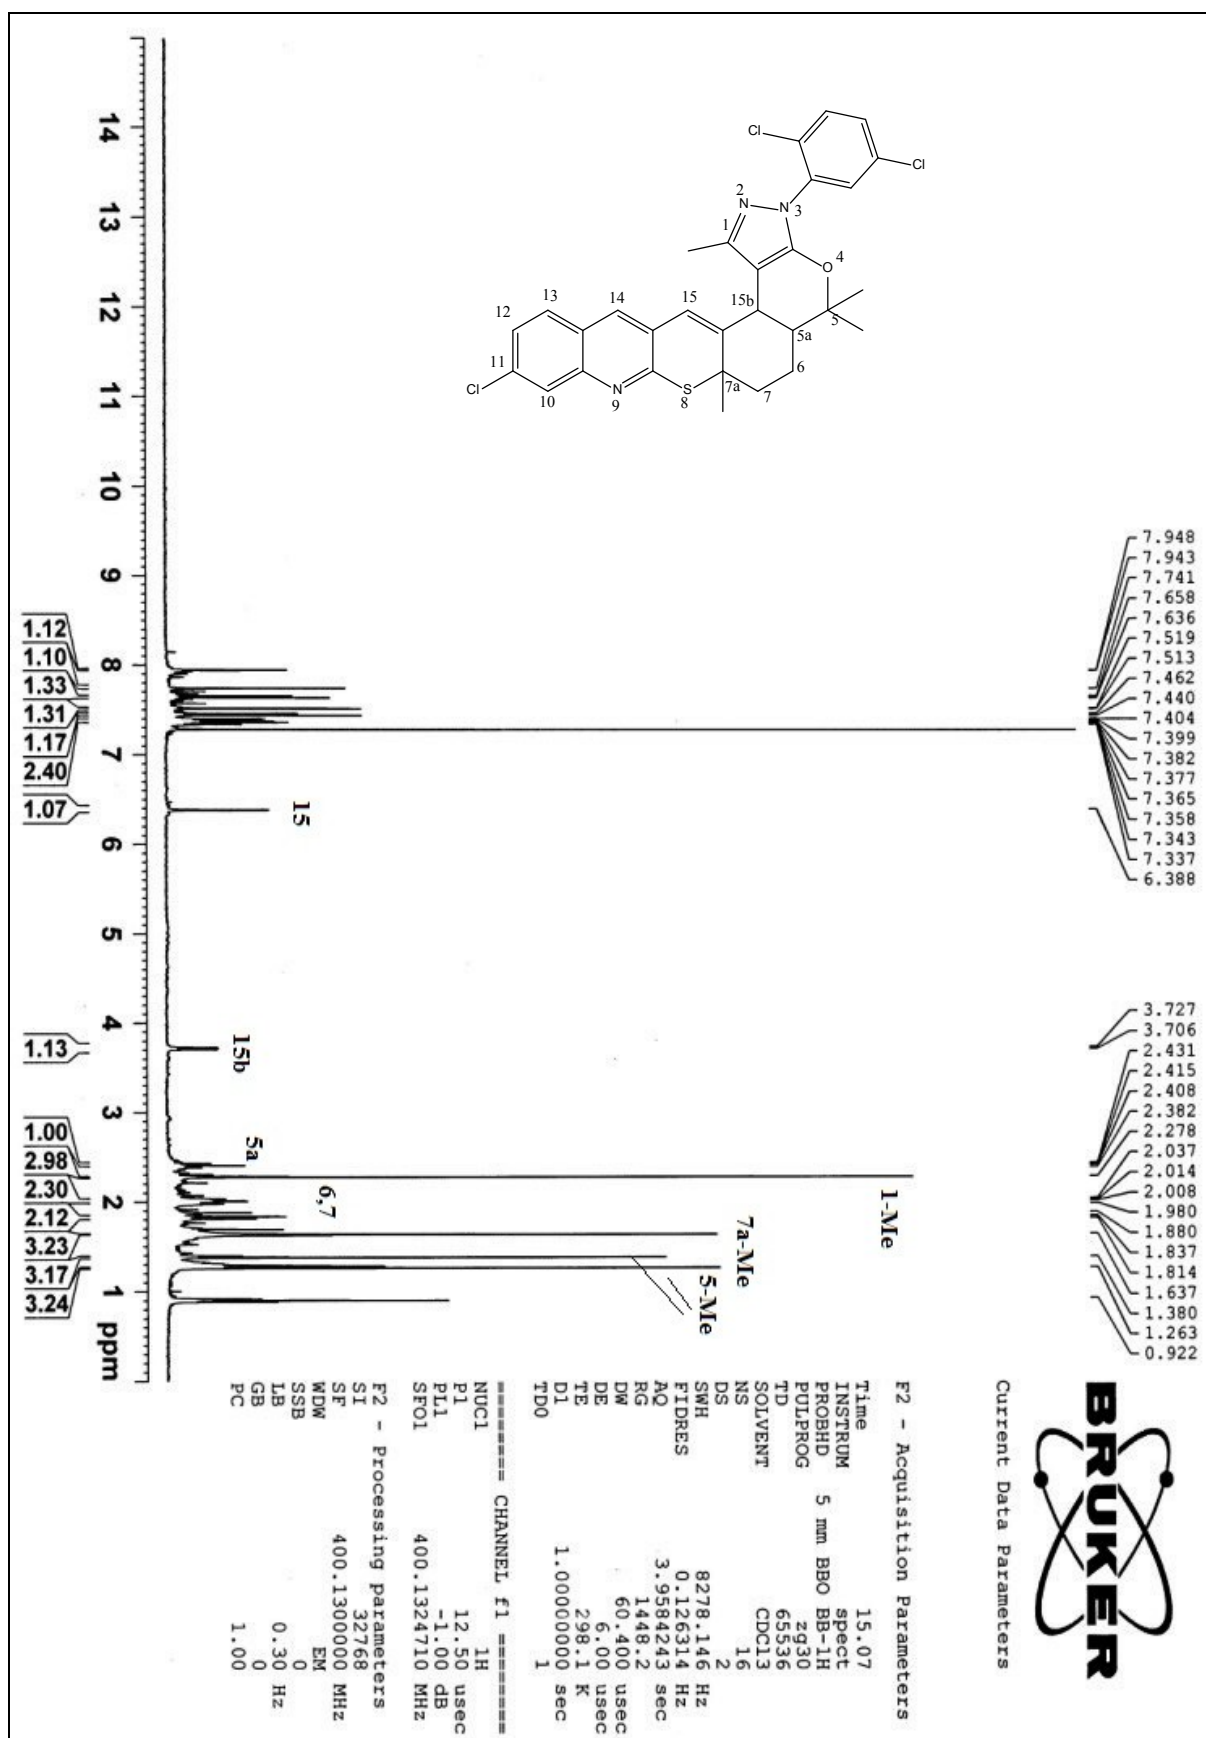

FT-IR spectrum of compound 5k

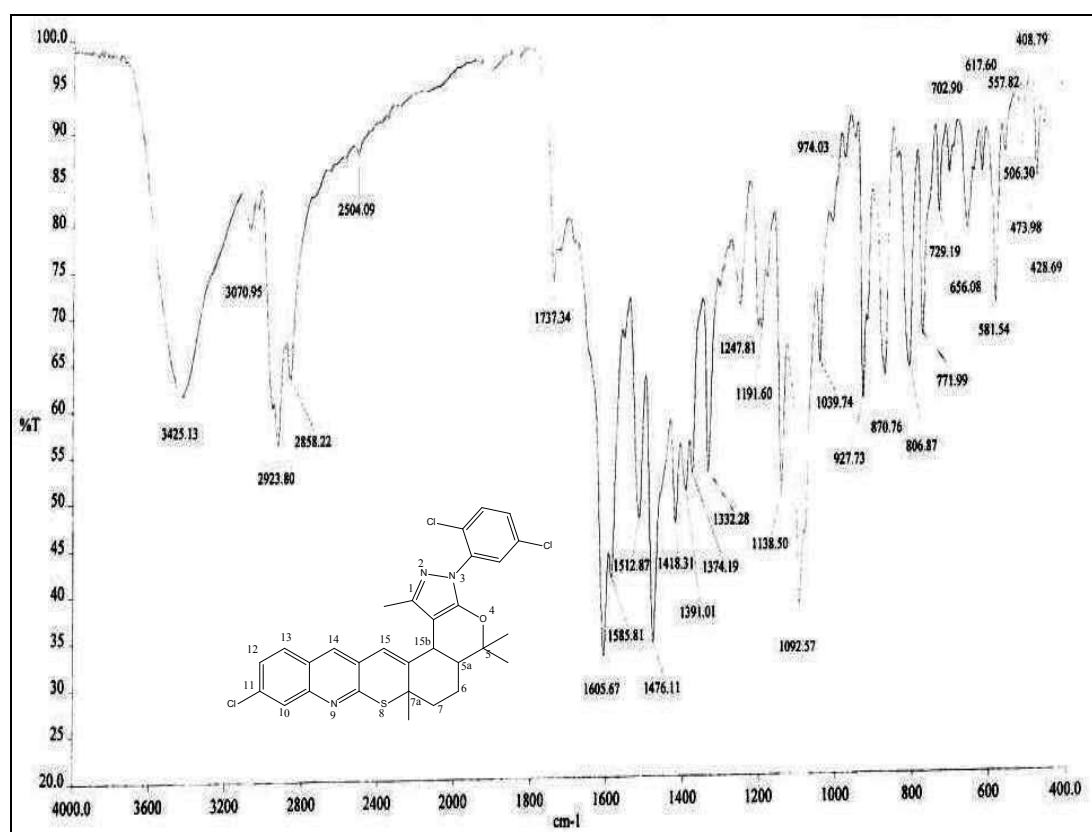

FT-IR spectrum of compound 5n

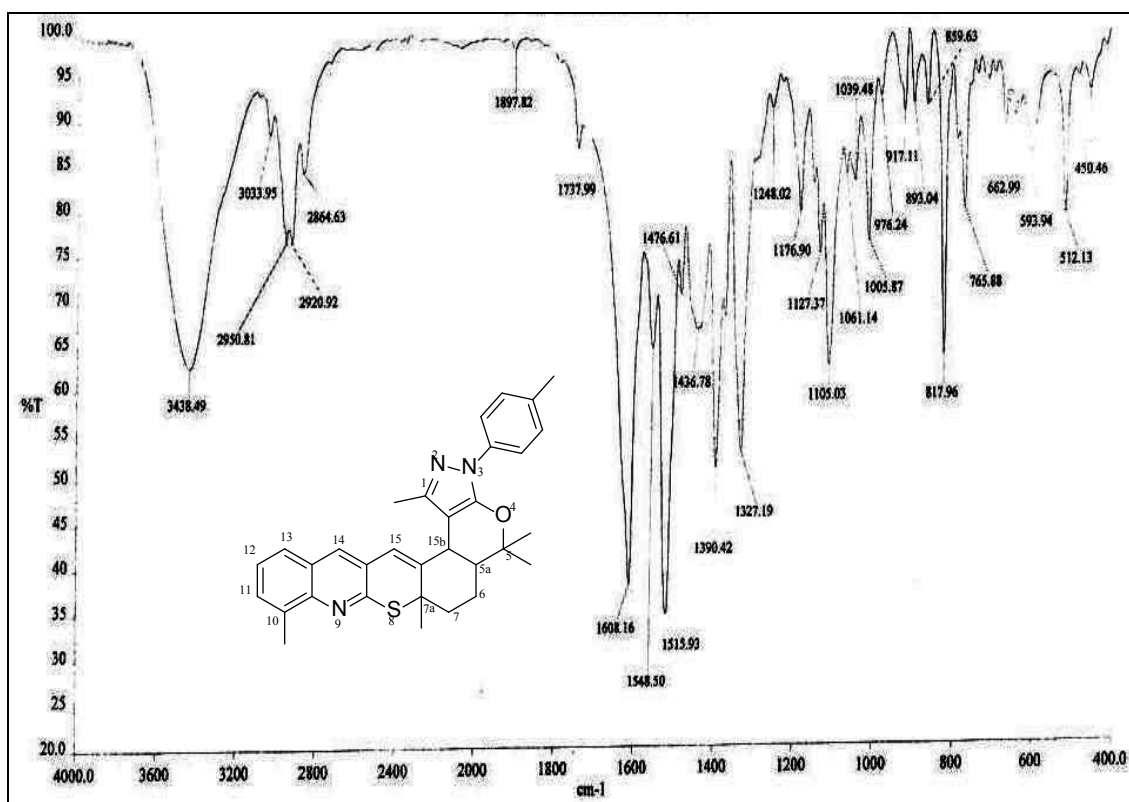

<sup>1</sup>H NMR spectrum of compound 5n

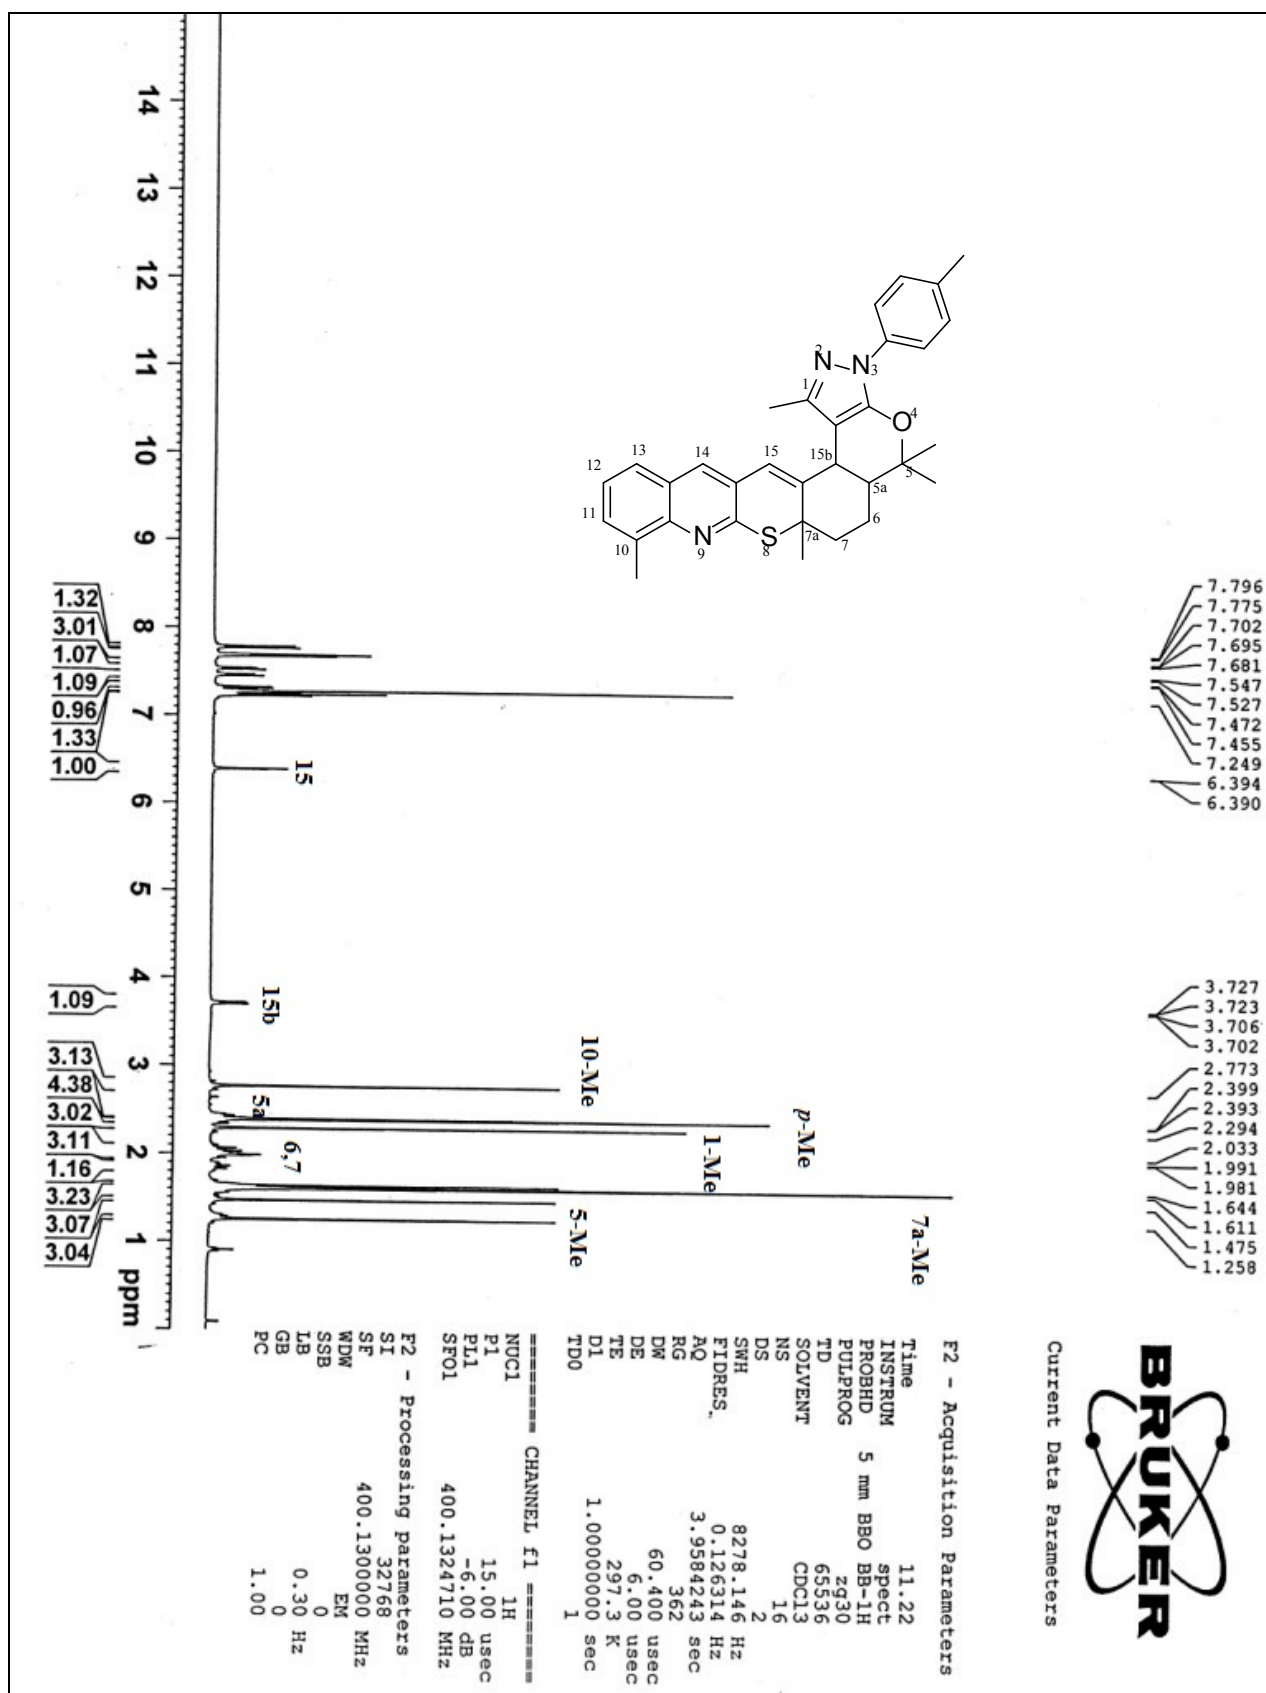

APT spectrum of compound 5n

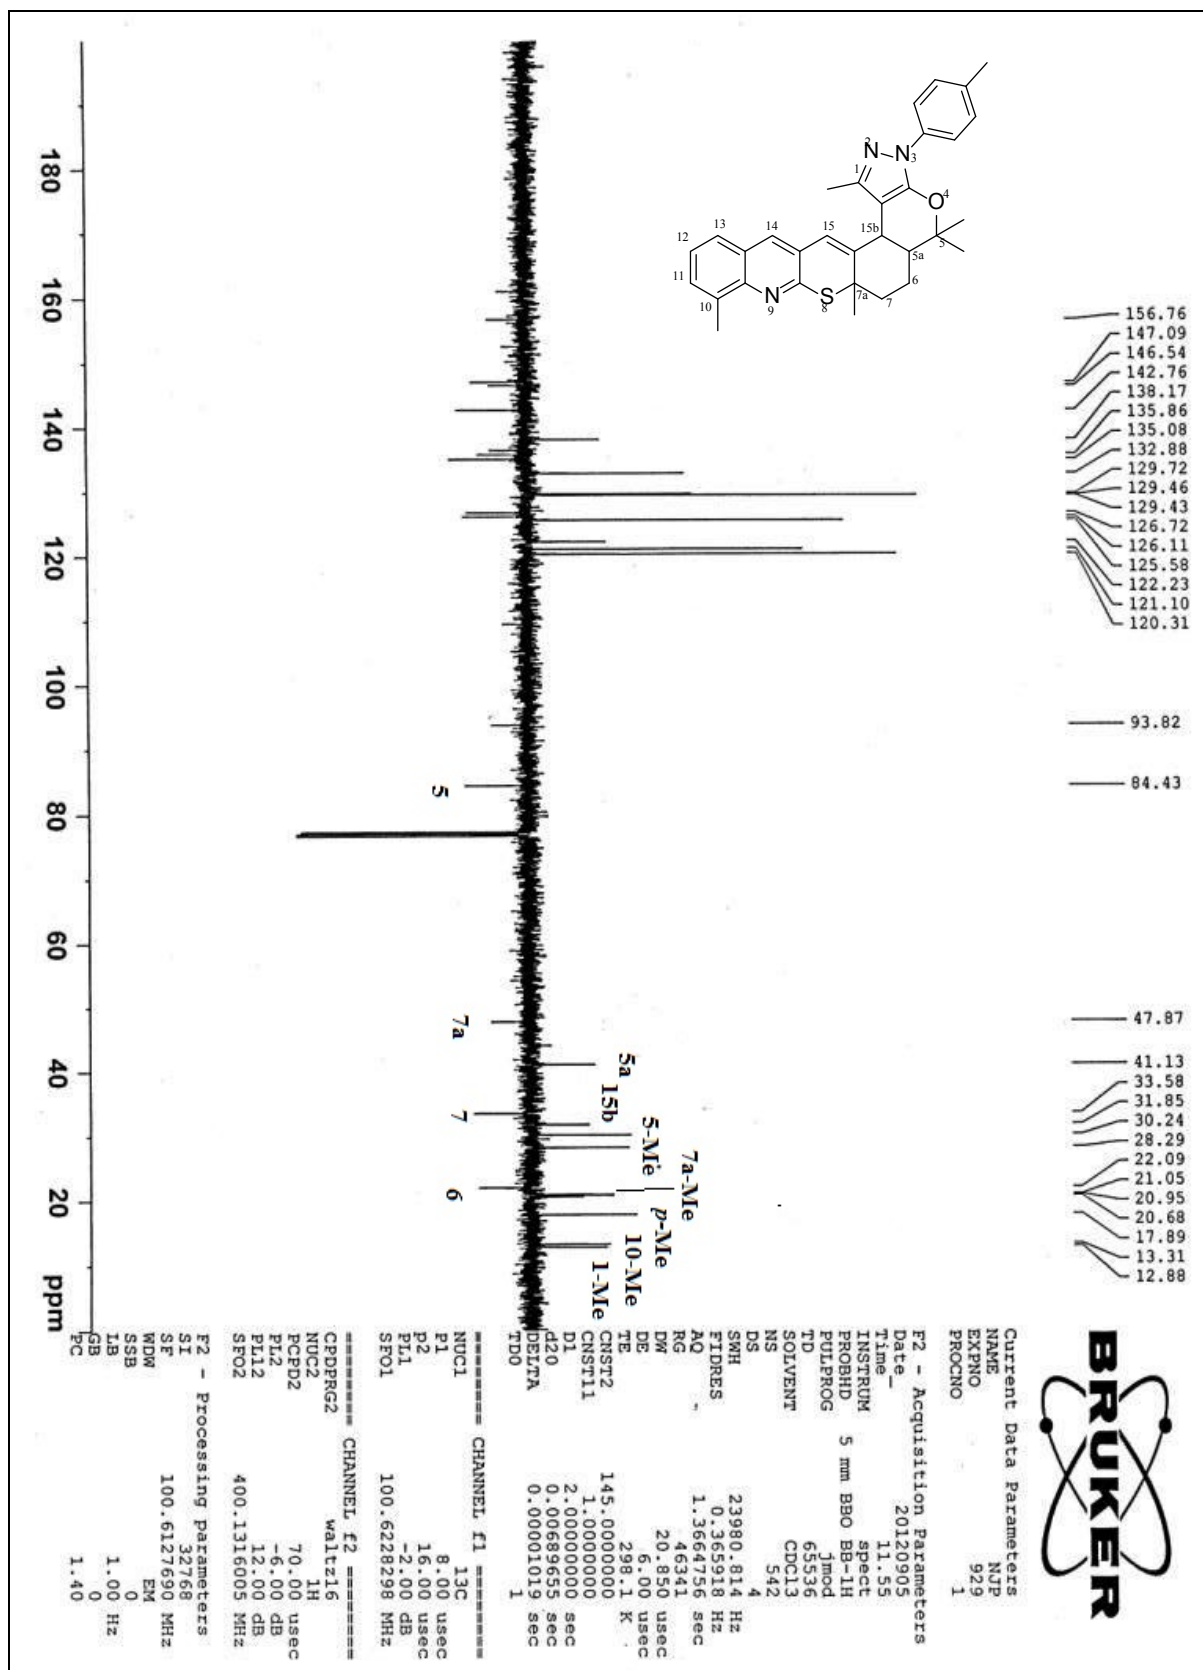

<sup>1</sup>H NMR spectrum of compound 5r

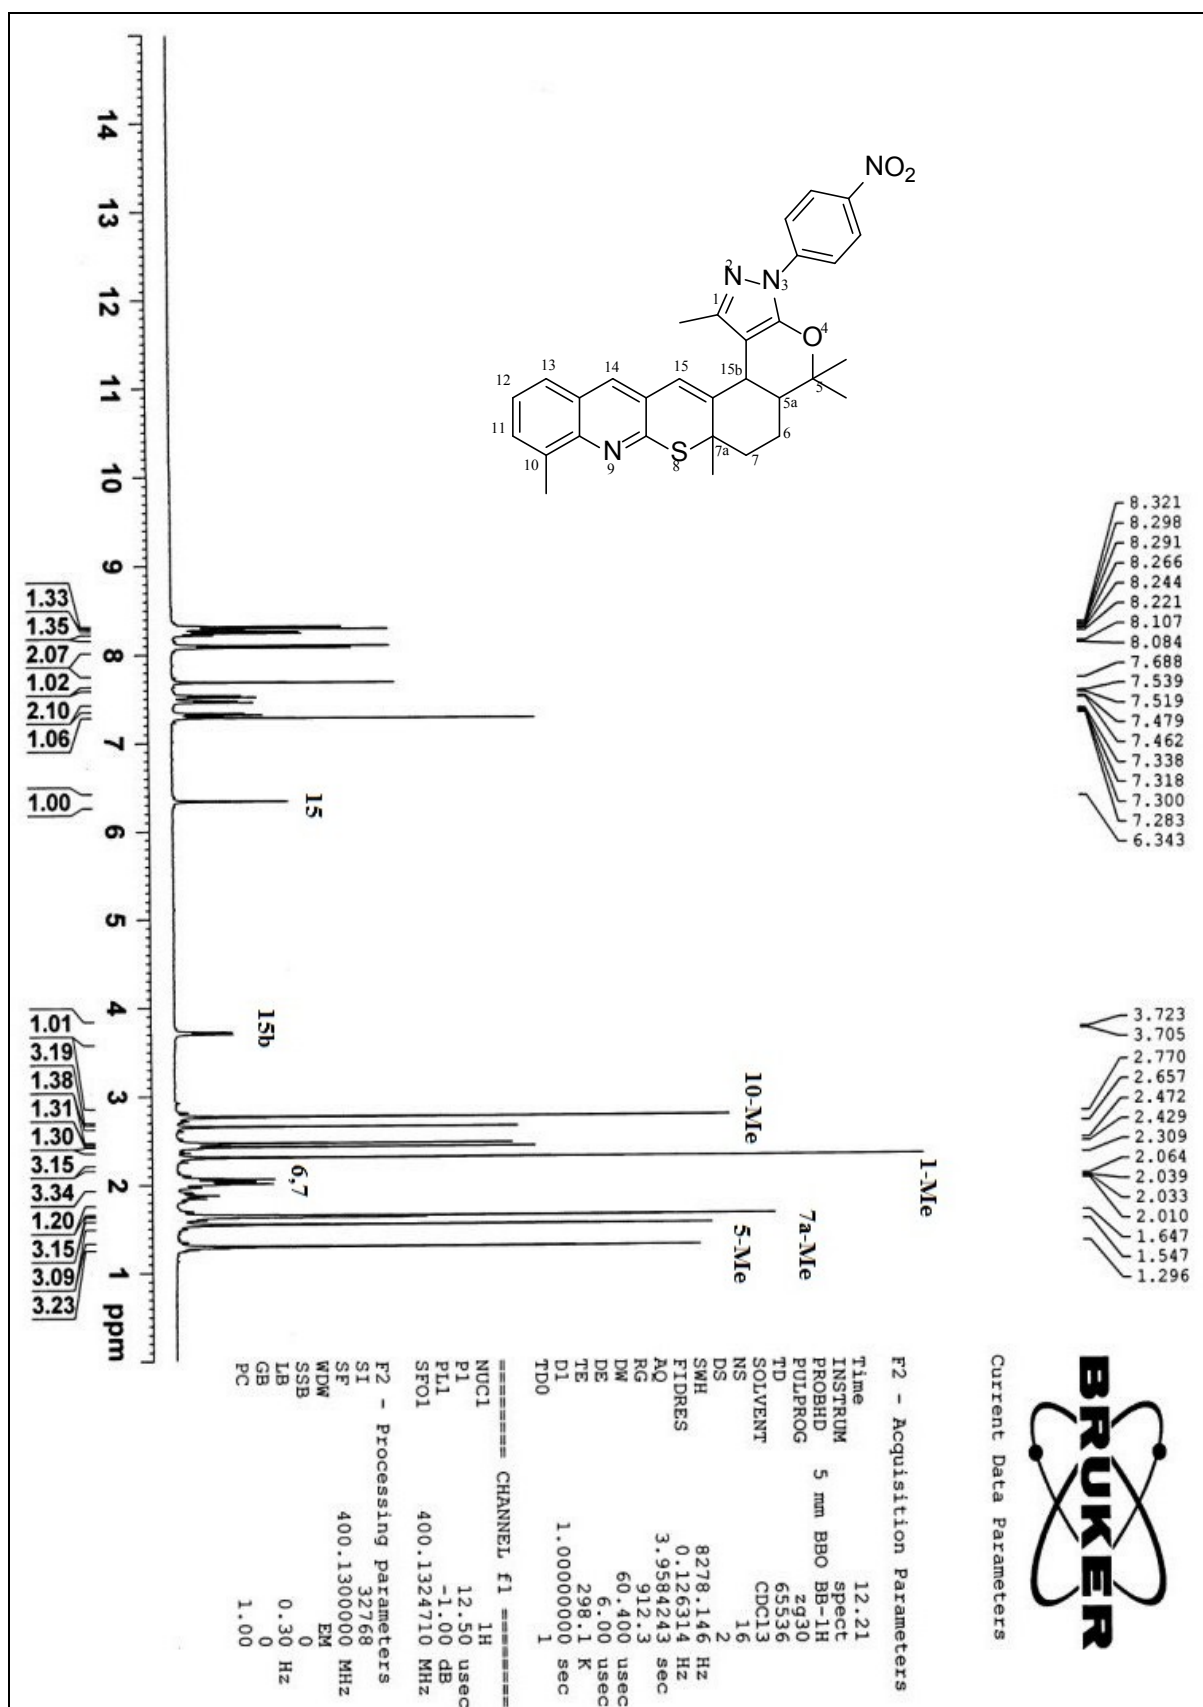

APT spectrum of compound 5r

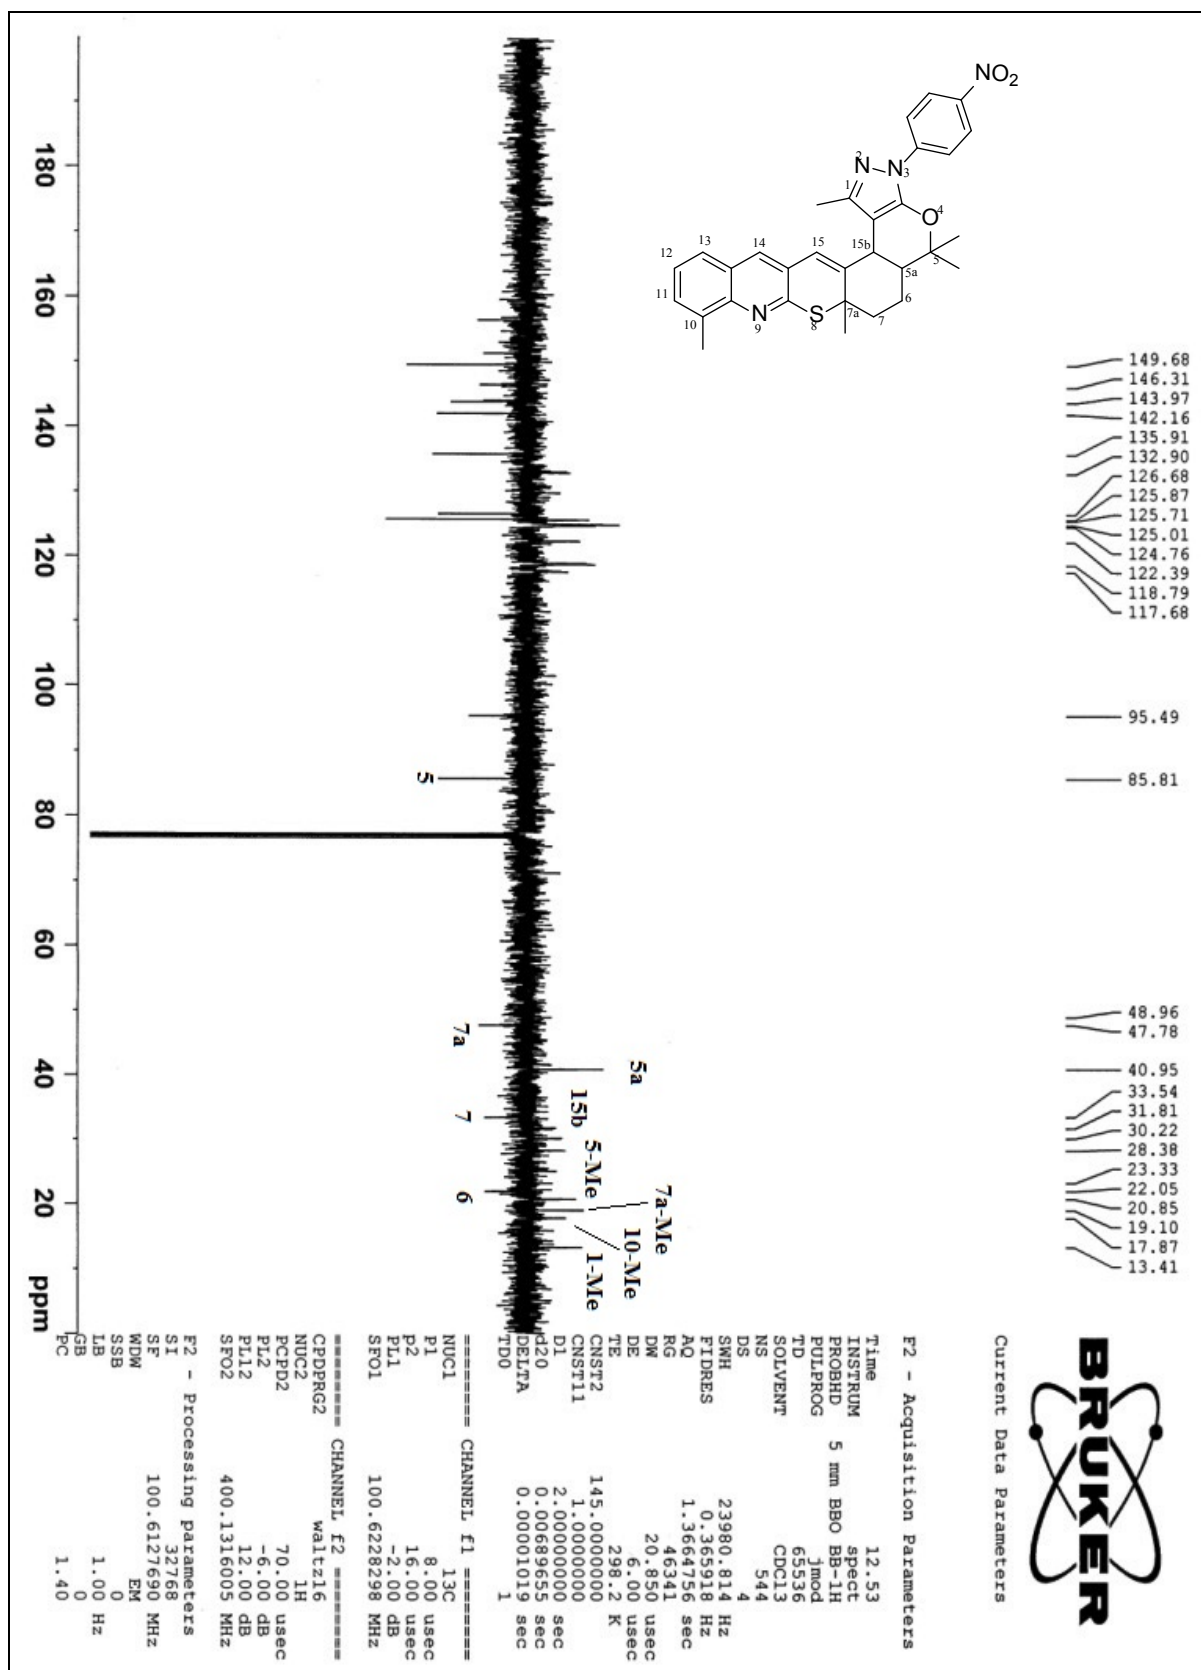

### ESI-MS of compound 5r

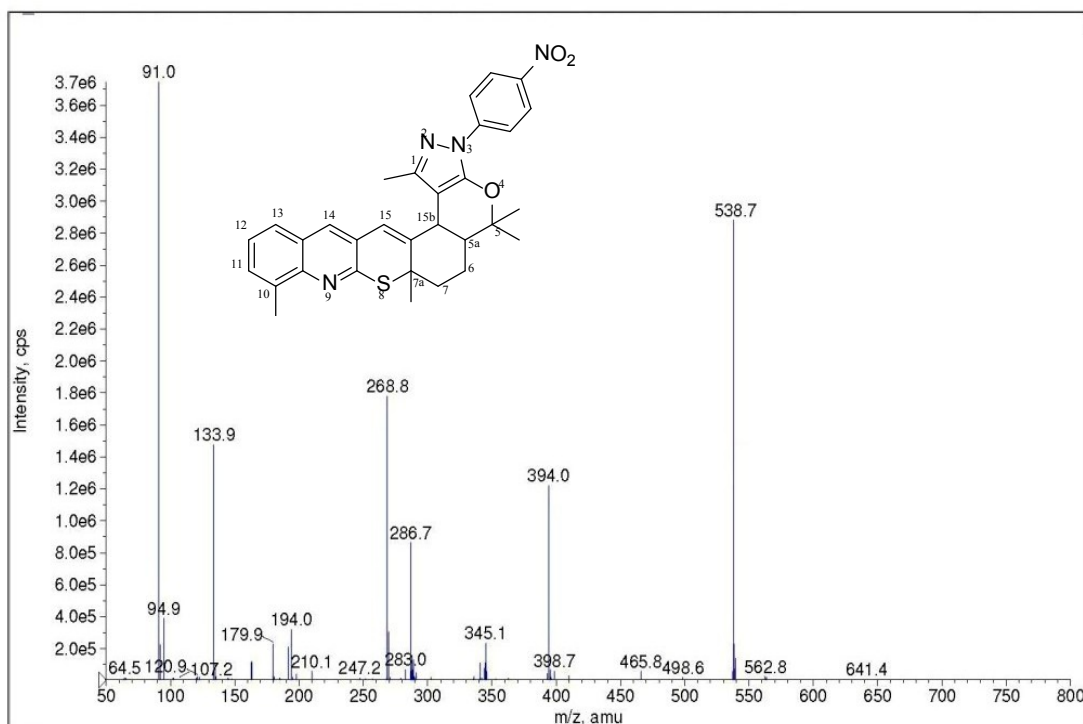

### FT-IR spectrum of compound 5r

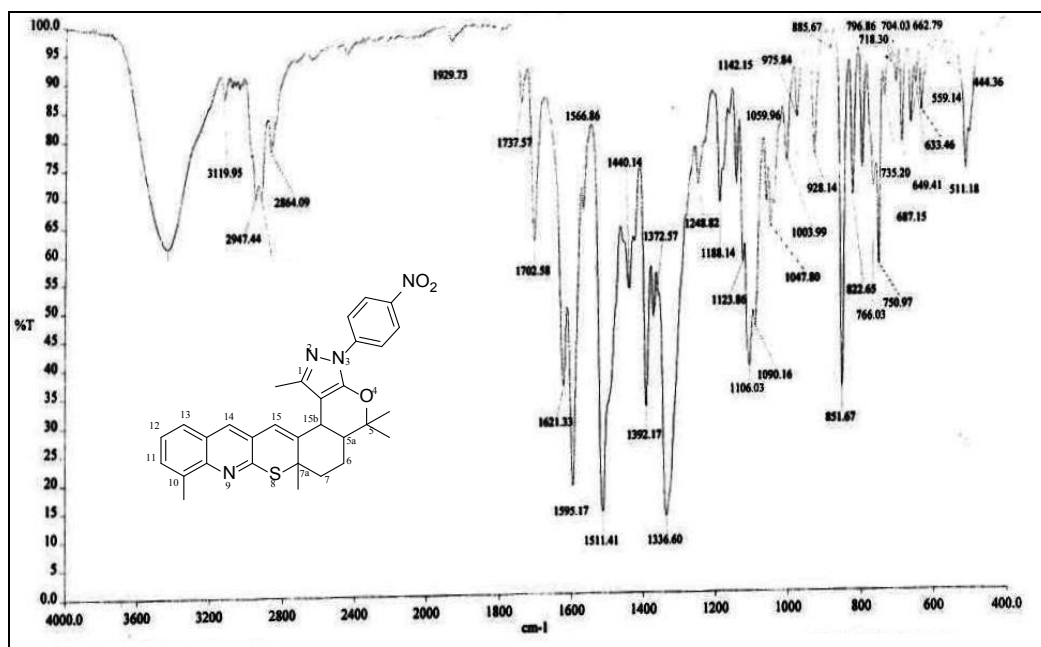

Supplement: c3ra43205j.pdf [file c3ra43205j.pdf]
